# Supplementary material
Source: publisher figshare collection journal article supplement (https://gsapubs.figshare.com/ndownloader/files/22397508)
Supplement: Supplementary file 1 [file 22397508]

## Sheet: S1. Unit Nomenclature
Table S1. Summary of Yerington unit nomenclature
IUGS classification1	Abbreviation (used in text)	Anaconda Company classification2	Analysis abbreviation in data tables
McLeod Hill quartz monzodiorite	Jqmd	Granodiorite	Jgd
Bear quartz monzonite	Jbqm	Bear quartz monzonite	Jbqm
Luhr Hill granite (porphyritic)	Jpg	porphyritic quartz monzonite	Jpqm
Luhr Hill granite porphyry dikes	Jgp(1, 1.5, 2, 3)	quartz monzonite porphyry	Jqmp (-1, -1.5, -2, -3)
1Carten, 1986; Dilles, 1987; Dilles and Wright, 1988; Dilles et al., 2015; and others
2Proffett and Dilles, 1984; Proffett, 2009; former Anaconda Co. documents

## Sheet: S2 Rock Desc.
Table S2. Description of Yerington mine rocks**
Sample	IUGS Rock Type	Mineralogy and Alteration
Jgp1 (Jqmp1)	Granite	Porphyry dike with the most intense Cu sulfide mineralization, potassic alteration, secondary magnetite, and abundant quartz veins. Abundant 1-4 mm subhedral plagioclase phenocrysts, less abundant potassium feldspar phenocrysts ≤1 cm diameter, occasional rounded quartz eyes, and 5-10% mafic phehocrysts with hornblende~biotite and a fine to medium-grained (k-spar>plagioclase)>quartz groundmess. Ac…
Jgp1.5 (Jqmp1.5)	Granite	Porphyry dike with moderate to intense mineralization, potassic alteration and quartz veins. Abundant 1-4 mm subhedral plagioclase phenocrysts, less abundant potassium feldspar phenocrysts ≤1 cm diameter, occasional rounded quartz eyes, and 5-10% mafic phehocrysts with hornblende~biotite and a fine-grained (k-spar>plagioclase)>quartz groundmess. Accessory sphene is common and magnetite is abundan…
Jgp2 (Jqmp2)	Granite	Porphyry dike with slight to moderate mineralization, potassic alteration and quartz veins. More phenocrysts than other porphyries. Abundant 1-4 mm subhedral plagioclase phenocrysts, less abundant potassium feldspar phenocrysts ≤1 cm diameter, occasional rounded quartz eyes, and 5-10% mafic phehocrysts with hornblende~biotite and a fine-grained (k-spar>plagioclase)>quartz groundmess. Sphene and m…
Jgp3 (Jqmp3)	Granite to quartz monzonite	Late porphyry dike with little to no mineralization or quartz veins. Abundant 1-4 mm subhedral plagioclase phenocrysts, less abundant potassium feldspar phenocrysts ≤1 cm diameter, common rounded quartz eyes, and 5-10% mafic phehocrysts with hornblende >>biotite and a fine-grained (k-spar>plagioclase)>quartz groundmess. Sphene and magnetite are common accessories. Weak seritization, chloritized m…
Jbqm	Granite	Seriate, fine-grained; abundant biotite, hornblende, and graphic quartz and potassium feldspar up to 1 cm. This sample could also be from the main Jqm unit, which is medium-grained. It is a host to later porphyry dikes.
Jpg (Jpqm)	Granite	Porphyritic with equigranular, medium-grained groundmass of quartz, plagioclase, hornblende, biotite, magnetite, sphene, and 7-8% eu-to-subhedral potassium feldspar phenocrysts ≤1 cm diameter; minor sericitic alteration. Largest magmatic source of the porphyry dikes.
Jqmd (Jgd)	Quartz monzodiorite	Fine-to-medium grained and seriate, with plagioclase>>potassium feldspar, abundant magnetite and sphene and little quartz. Jgd is a minor porphyry host.
**Source of all descriptions is Proffett and Dilles, 1984; Dilles 1987; and Dilles and Wright, 1988 with minor supplemental imformation from J. Proffett (pers. comm.)

## Sheet: S3 Raman
Table S3. Laser Raman analyses and characterization
	Eg (tetrahedron rotation, I)		A1g (symmetric bending, υ2)		B1g (antisymmetric stretching, υ3)					Re-calc "real" corrected FWHM:	Original FWHM measured in Origin
Analysis	υ (cm-1)	I (counts)	υ (cm-1)	I (counts)	υ (cm-1)	I (counts)	FWHM (cm-1)	SE FWHM	Extra Peaks?			Peaks (cm-1)
Jgp1
qmp1_1.1	354.746	6952.52	438.723	9926.92	1005.89	34207	6.44837	0.1689	No	6.44837	6.78833
qmp1_3.1	354.803	4833.91	438.723	6044.34	1007.78	15761.1	6.59112	0.16883	No	6.59112	6.92408
qmp1_4.1	354.803	9015.44	438.723	7413.87	1005.89	19001.6	6.51006	0.17908	No	6.51006	6.84696
qmp1_5.1	354.966	8397.39	438.723	13970.4	1005.89	41565.5	5.90233	0.16265	No	5.90233	6.27196
qmp1_6.1	354.988	6221.05	438.723	10193.5	1007.78	40291.7	5.66885	0.13576	No	5.66885	6.05276
qmp1_10.1	354.839	4423.98	438.723	10855.5	1005.89	45261.2	6.65295	0.1907	No	6.65295	6.98296
qmp1_13.1	354.803	6687.77	438.723	4666.15	1005.89	16284.2	6.54464	0.16548	No	6.54464	6.87985
qmp1_14.1	354.698	4623.73	438.723	8634.77	1007.78	29273.1	6.24866	0.14972	No	6.24866	6.59892
qmp1_15.1	354.456	4305.81	438.723	7065.04	1005.89	24160.3	5.79759	0.18689	No	5.79759	6.1735
qmp1_19.1	354.803	7338.94	438.723	10324.9	1007.78	31547.4	5.94745	0.15179	No	5.94745	6.31444
							6.23224		Jgp1 (untreated)	6.23224	6.58338
Jgp1 (TA/CA)
qmp1cata_1.1	356.861	9472.36	438.723	11308.7	1007.78	42003.3	5.54223	0.12445	No	5.54223	5.93433
qmp1cata_3.1	356.852	2885.18	438.723	9639.5	1007.78	27352.9	5.85084	0.1441	No	5.85084	6.22353
qmp1cata_5.1	356.996	3873.85	438.723	7982.56	1007.78	27308	6.04102	0.19944	No	6.04102	6.40265
qmp1cata_6.1	356.861	6020.02	438.723	5986.61	1007.65	3082.09	19.1471	8.05342	Yes	19.1471	19.2643	Other peaks at 119, 201, 224, 1113, 1463, 1611
qmp1cata_7.1	356.68	6083.41	438.723	10129.6	1007.78	31003.2	5.88581	0.14343	No	5.88581	6.25642
qmp1cata_8.1	355.142	4520.01	438.723	7906.41	1007.78	21079.6	5.67284	0.12461	No	5.67284	6.05649
qmp1cata_9.1	356.861	11769.1	439.055	3335.11	1007.78	11281.4	5.67214	0.12933	Yes	5.67214	6.05584	Also peak at 224 (4157.29)
qmp1cata_10.1	356.384	7482.54	438.723	10963.6	1007.78	44515.3	5.48535	0.12884	No	5.48535	5.88125
qmp1cata_12.1	356.861	8742.03	438.723	6044.34	1007.78	8974.1	5.6405	0.14662	Yes	5.6405	6.02621	Also peaks at 201 (2326.92) and 224 (3394.36)
qmp1cata_13.1	356.861	5279.97	438.723	5059.27	1007.78	14971.4	8.00866	0.19052	No	8.00866	8.28484
qmp1cata_14.1	356.065	5581.72	438.723	8417.37	1007.78	25243.7	5.97837	0.1722	No	5.97837	6.34357
							6		Jgp1 (treated)	5.98149	6.34651
									All Jgp1	6.10449
Jgp1.5
qmp1.5_1.1	354.803	11809.6	438.723	10822.3	1007.7	36134.1	5.83442	0.17695	No	5.83442	6.2081
qmp1.5_2.1	353.732	9768.95	438.723	13121.7	1005.89	49247.4	5.96836	0.14364	No	5.96836	6.33414
qmp1.5_4.2	354.697	8489.84	438.723	12383.5	1007.78	46932.1	6.03705	0.15581	No	6.03705	6.3989
qmp1.5_6.1	354.865	4082.46	438.723	6893.08	1007.78	25757.5	6.22299	0.13485	No	6.22299	6.57462
qmp1.5_8.1	354.881	7373.15	438.723	11850.4	1005.89	49392.7	5.76718	0.16871	No	5.76718	6.14495
qmp1.5_9.1	354.832	7349.13	438.723	10908.3	1005.89	41236.7	7.30764	0.18648	No	7.30764	7.60931
qmp1.5_10.1	354.803	13126.5	438.723	13022.2	1005.89	44847.9	5.8026	0.13577	No	5.8026	6.1782
qmp1.5_24.1	354.818	7638.47	438.723	13092.2	1007.78	34868.9	5.84786	0.14683	Yes	5.84786	6.22073	Also peak at 973 (8723.89)
qmp1.5_25.1	354.803	11900.7	438.723	9922.01	1005.89	19082.1	6.29746	0.20189	Yes	6.29746	6.64515	Also peak at 224 (4928.57)
qmp1.5_26.1	354.689	7873.21	438.723	12290.1	1005.89	45382.7	5.8307	0.14255	No	5.8307	6.2046
							6.09316		Jgp1.5 (untreated)	6.09316	6.45187
Jgp1.5 (TA/CA)
qmp1.5cata_2.1	356.861	7796.62	438.723	5673.4	1007.78	10425.5	5.80858	0.10388	Yes	5.80858	6.18382	Also peak at 224 (3008.72)
qmp1.5cata_3.1	356.885	5578.24	438.723	10176.2	1007.78	33145.4	5.71798	0.17588	No	5.71798	6.09879
qmp1.5cata_3.2	355.05	7047.21	438.723	13245.7	1007.78	46451.4	5.44825	0.1173	No	5.44825	5.84666
qmp1.5cata-4.1	354.803	10123.4	438.723	9915.87	1007.78	21782.2	5.69716	0.12207	Yes	5.69716	6.07928	Also peak at 973 (7168.22)
qmp1.5cata-5.1	355.66	7696.9	438.723	13258	1007.78	47308.5	5.49164	0.13485	No	5.49164	5.88711
qmp1.5cata-6.1	354.99	9936.8	438.723	16148.1	1007.78	66491.6	5.45496	0.13824	No	5.45496	5.85291
qmp1.5cata-7.1	354.791	5833.41	438.723	15186.4	1007.78	31127.2	5.43071	0.12668	Yes	5.43071	5.83032	Also peak at 973 (10816.1)
qmp1.5cata-8.1	356.861	15978.4	438.723	9944.12	1007.78	19988.7	5.5483	0.11932	Yes	5.5483	5.94	Also peak at 224 (5471.81)
qmp1.5cata_10.1	356.861	15888.5	438.723	10972.2	1007.78	20329.4	5.77223	0.11197	Yes	5.77223	6.14969	Also peak at 224 (5779.85)
qmp1.5cata_12.1	354.803	13593	438.819	8206.45	1007.78	40640.3	5.16683	0.111	No	5.16683	5.58535
qmp1.5cata_15.1	354.803	13150.8	438.723	5259.65	1007.78	21279	5.27062	0.12975	No	5.27062	5.6815
							5.52838		Jgp1.5 (treated)	5.52838	5.9214
									All Jgp1.5	5.79636
Jgp2
qmp2_1.1	354.992	5700.56	438.72	10167.7	1005.89	34629.5	6.01102	0.15299	No	6.01102	6.37435
qmp2_2.1	354.563	5891.2	438.72	8451.76	1005.89	29638.5	6.04191	0.14951	No	6.04191	6.40349
qmp2_3.1	354.803	9136.92	438.72	9936.75	1005.89	37980.7	5.54759	0.1471	No	5.54759	5.93934
qmp2_4.1	354.803	6243.14	438.72	9837.26	1007.78	25153.9	5.95019	0.15567	No	5.95019	6.31702
qmp2_5.1	354.803	6931.96	438.72	10571.8	1005.89	20884.4	5.67233	0.14918	Yes	5.67233	6.05602	Also peak at 973 (7298.4)
qmp2_6.1	354.539	7647.34	438.72	13065.2	1007.78	42428.6	6.07963	0.15559	No	6.07963	6.43909
qmp2_7.1	354.96	2576.39	438.72	4214.21	1005.89	11731.6	6.29568	0.15031	No	6.29568	6.64346
qmp2_9.1	355	9788.88	438.72	18011.4	1005.89	48733.8	5.56159	0.14873	No	5.56159	5.95242
							5.89562		Jgp2 (untreated)	5.89562	6.26565
Jgp2 (TA/CA)
qmp2cata_1.1	354.803	11808.4	438.72	8493.52	1007.78	29553.1	5.44988	0.12134	No	5.44988	5.84818
qmp2cata_2.1	355.915	5095.69	438.72	13707.6	1007.78	59662.3	5.28386	0.1362	No	5.28386	5.69378
qmp2cata_3.1	354.803	6087.64	438.72	9676.35	1007.78	12901.8	5.88668	0.16973	Yes	5.88668	6.25724	Also peak at 973 (7790.22)
qmp2cata_4.1	354.851	6670.07	438.72	11841.8	1007.78	46228.2	5.20014	0.14363	No	5.20014	5.61618
qmp2cata_5.1	355.631	8229.52	438.72	10936.6	1007.78	41850.1	5.53561	0.1104	No	5.53561	5.92815
qmp2cata_6.1	355.876	6680.69	438.72	10694.6	1007.78	42205.4	5.55188	0.12224	No	5.55188	5.94335
qmp2cata_8.1	355.921	6286.62	438.72	9694.78	1007.78	36180.4	5.59928	0.12963	No	5.59928	5.98765
qmp2cata_10.1	356.496	4420.02	438.72	10913.2	1007.78	37266	5.28474	0.11396	No	5.28474	5.6946
							5.47451		Jgp2 (treated)	5.47451	5.87114
									All Jgp2	5.6845
Jgp3
qmp3_5.1	354.803	11948.1	438.72	4916.79	1005.89	15239.8	5.56099	0.14811	Yes	5.56099	5.95186	Also peak at 224 (4650.39)
qmp3_6.1	354.803	9627.72	438.72	13522.1	1007.78	10893.1	5.78403	0.1693	Yes	5.78403	6.16076	Also peaks at 224 (4015.21) and 973 (9568.14)
qmp3_7.1	354.803	9914.43	436.797	4022.39	1004	11718.2	9.38662	0.20861	Yes	9.38662	9.62334	Also peaks at 119, 201, 222, 1089, 1111, 1460
qmp3_8.1	354.803	10825.6	438.72	7136.28	1005.89	13092.9	6.18899	0.20316	Yes	6.18899	6.54245	Also peak at 224
qmp3_17.1	354.803	8761.53	438.72	10154.2	1005.89	36075.4	6.63882	0.16858	No	6.63882	6.9695
qmp3_18.1	354.803	9184.3	438.72	10811.3	1005.89	29040.4	6.48894	0.18766	No	6.48894	6.82688
qmp3_19.1	354.803	11918.9	438.72	13202.7	1005.89	49568.3	5.59392	0.14212	No	5.59392	5.98264
qmp3_20.1	354.946	8085.08	438.72	13275.2	1005.89	49312.1	5.9281	0.16358	No	5.9281	6.29622
							6.45455		Jgp3 (untreated)	6.45455	6.79421
Jgp3 (TA/CA)
qmp3cata_1.1	354.803	9441.85	438.723	9089.24	1007.78	17582.4	6.06615	0.16843	Yes	6.06615	6.42637	Also peak at 973 (6163.53)
qmp3cata_2.1	354.622	9072.08	438.723	17028.8	1007.78	53575.4	5.61578	0.13214	No	5.61578	6.00308
qmp3cata_3.1	354.803	11330.9	438.719	5212.38	1007.78	22634	5.4461	0.13499	No	5.4461	5.84466
qmp3cata_4.1	354.803	13152	438.723	9665.3	1007.78	7343.05	5.53069	0.16608	Yes	5.53069	5.92356	Also peak at 224
qmp3cata_6.1	354.803	9613.14	438.723	8058.71	1007.46	3878.38	6.11585	0.42551	Yes	6.11585	6.4733	Also peaks at 224 and 1462
qmp3cata_7.1	356.028	7243.15	437.62	9731.96	1007.78	46867.4	5.12531	0.12957	No	5.12531	5.54696
qmp3cata_10.1	356.838	2770.06	438.723	12384.7	1007.78	50672.3	5.29077	0.11631	No	5.29077	5.7002
							5.59998		Jgp3 (treated)	5.59998	5.9883
									All Jgp3	6.05074
Jbqm
bqm_1.1	355.077	7260.71	438.723	11742.3	1007.78	48643.7	5.79297	0.12504	No	5.79297	6.16916
bqm_2.1	355.18	8114.97	438.723	15320.3	1007.78	65238.2	5.68116	0.13809	No	5.68116	6.06429
bqm_3.1	354.803	10397.9	438.723	10986.9	1005.89	40608.2	6.70962	0.19051	No	6.70962	7.03697
bqm_4.1	354.803	9829.39	438.723	10606.2	1005.89	38611.8	7.04448	0.19973	No	7.04448	7.35695
bqm_6.1	355.162	7711.14	438.723	13662.1	1007.78	57444.8	5.60698	0.14073	No	5.60698	5.99485
bqm_7.1	354.604	7094.96	438.723	10731.4	1005.89	43453.6	6.38811	0.15822	No	6.38811	6.73112
bqm_8.1	355.035	8679.29	438.723	14669.3	1005.89	63553.7	5.95153	0.15673	No	5.95153	6.31828
bqm_9.1	354.579	6629.55	438.723	10998	1007.78	41464.5	5.92925	0.12886	No	5.92925	6.2973
							6.13999		Jbqm (untreated)	6.13999	6.49611
Jbqm (TA/CA)
bqmcata_1.1	355.345	11287	438.723	15939.3	1007.78	58117.1	5.80888	0.14387	No	5.80888	6.1841
bqmcata_9.1	356.183	3452.12	438.723	6320.7	1007.78	15551.2	5.9355	0.15983	No	5.9355	6.30319
bqmcata_10.1	354.624	5687.87	438.723	7701.29	1007.78	24090.7	6.75341	0.19053	No	6.75341	7.07874
bqmcata_11.1	355.121	6753.24	438.723	12764.2	1007.78	36348.1	5.35464	0.11426	No	5.35464	5.75953
bqmcata_12.1	356.861	9810.18	438.723	8118.9	1007.78	20577.7	5.68945	0.12105	No	5.68945	6.07205
bqmcata_13.1	354.803	5297.98	438.723	6529.51	1007.78	17050.1	6.62051	0.149	No	6.62051	6.95206
bqmcata_14.1	355.729	4809.95	438.723	8428.42	1007.78	34001.2	5.21701	0.12127	No	5.21701	5.6318
bqmcata_15.1	355.482	7884.15	438.723	14399.1	1007.78	63855.5	5.55354	0.10108	No	5.55354	5.9449
							5.86819		Jbqm (treated)	5.86819	6.23985
									All Jbqm	6.00232
Jpg
pqm_2.1	354.601	3271.41	439.467	4425.03	1005.89	19352.8	5.70997	0.1514	No	5.70997	6.09129
pqm_5.1	354.803	2817.25	436.687	4022.76	1005.89	5276.23	6.55411	0.24461	Yes	6.55411	6.88886	Also peaks at 224 (1450.63) and 971 (3462.95)
pqm_6.1	354.647	3306.32	438.723	5282.81	1005.89	18484	6.30314	0.1853	No	6.30314	6.65053
pqm_9.1	354.645	2888.52	438.723	4183.51	1005.89	14749.9	6.71874	0.20137	No	6.71874	7.04567
pqm_10.1	353.459	3122.99	438.723	4246.15	1005.89	13755.7	7.89686	0.40682	No	7.89686	8.17682
							6.32272		Jpg (untreated)	6.32272	6.66909
Jpg (TA/CA)
pqmcata_1.1	354.803	2174.59	438.723	1868.21	1005.03	868.126	3.57005	0.15543	Yes	3.57005	4.15274	Also peaks at 1054 (2220.01) and 1462 (1342.06)
pqmcata_2.1	354.803	3998.09	438.723	5317.2	1007.78	8678.27	5.66551	0.29074	Yes	5.66551	6.04963	Also peaks at 973 (3169.22)
pqmcata_3.1	354.803	3817.07	438.723	4318.62	1007.78	9952.74	5.48783	0.14628	Yes	5.48783	5.88356	Also peaks at 973 (3262.58)
pqmcata_6.1	355.845	2909.85	438.723	4796.41	1007.78	19105.1	4.92762	0.12121	No	4.92762	5.36483
pqmcata_8.1	354.818	3315.9	438.723	4773.08	1007.78	16556.2	5.46394	0.15242	No	5.46394	5.86128
							4.91922		Jpg (treated)	5.03368	5.46241
									All Jpg	5.82978
Jqmd
gd_1.1	353.495	2497.5	438.059	4477.64	1005.89	19661.7	6.52802	0.19005	No	6.52802	6.86404
gd_2.1	352.744	648.557	436.687	601.695	1004	934.605	6.80659	0.21619	Yes	6.80659	7.12949	Also peaks at 224 (356.987) and 971 (514.053)
gd_3.1	354.803	3885.1	438.723	2949.09	1005.89	6951.79	6.42097	0.17486	No	6.42097	6.76231
gd_4.1	354.288	2530.34	438.723	3347.05	1004	11467.4	6.96979	0.203	No	6.96979	7.28546
gd_5.1	354.803	1986.29	438.723	3037.52	1005.89	3942.65	7.36224	0.21925	Yes	7.36224	7.66176	Also peaks at 221 (1019.34), 971 (2574.21), 1456 (2639.01), and 1462
							6.81824		Jqmd (untreated)	6.81824	7.14061
Jqmd (TA/CA)
gdcata_2.1	354.829	2971.56	438.723	5099.8	1005.89	19467.6	5.86399	0.16626	No	5.86399	6.23589
gdcata_3.1	354.607	2696.43	436.687	3904.88	1005.89	13243.4	7.65972	0.22674	No	7.65972	7.94804
gdcata_4.1	354.716	5513.62	438.723	7496.16	1005.89	22383	7.9144	0.25078	No	7.9144	8.19376
gdcata_7.1	354.803	3787.92	438.723	3081.74	1005.89	4077.33	6.72233	0.21188	Yes	6.72233	7.04909	Also peaks at 200, 224 (1568.83), 973 (2680.03), and 1462
gdcata_11.1	354.803	2972.75	438.723	3647.98	1005.89	3909.64	7.45509	0.3142	Yes	7.45509	7.75102	Also peaks at 121, 129, 201, 224, 973, 1089, 1109, 1462
									Jqmd (treated)	7.1231	7.43556
									All gd	6.97031
Mt. Dromedary
MtD_27.2	352.744	6111.49	438.723	10791.6	1005.89	8945.56	10.0484	0.328	Yes	9.82193	10.0484	Also peaks at 224, 970, 1053, 1087, 1111, 1143, 1457
MtD_28.1	354.17	2419.91	438.723	13703.9	1005.89	39377.6	6.41324	0.15354	No	6.05224	6.41324
MtD_29.1	354.803	13771.6	438.723	10663.9	1005.89	27370.1	6.66154	0.17848	No	6.31475	6.66154
MtD_31.2	353.227	6672.68	438.723	12444.9	1005.89	52780.8	6.92515	0.1745	No	6.59225	6.92515
							7.51208		Mt. Drom. (untreated)	7.19529	7.51208
Mt. Drom. (TA/CA)
MtDC_24.1	354.803	6737.58	438.723	4795.19	1007.78	6036.88	6.76946	0.15647	Yes	6.4285	6.76946	Also peaks at 224 and 1462
MtDC_25.1	356.861	12618.5	438.723	9715.66	1007.78	32635.6	6.07327	0.14057	No	5.69075	6.07327
MtDC_26.2	355.209	9259.28	438.723	14470.3	1007.78	44230	6.30304	0.17775	No	5.93534	6.30304
MtDC_27.1	354.993	5293.15	438.723	9778.3	1007.78	40306.2	6.70927	0.15958	No	6.36508	6.70927
									Mt. Drom. (treated)	6.10492	6.46376
									All Mt. Dromedary	6.65011

## Sheet: S4 U-Pb
Table S4. In situ U-Pb zircon geochronology
RED not included in Mean age and considered faulty due to suspected Pb-loss; Errors are 1σ unless otherwise noted
Analysis	Mount	Date	207Pb-corr. 206Pb / 238U Age (Ma)	1σ err	Th (ppm)	U (ppm)	204Pb / 206Pb	% err	207Pb / 206Pb	% err	208Pb / 206Pb	% err	207Pb-corr 204Pb / 206Pb	207Pb-corr % com 206Pb	232Th / 238U	% err	Total 238U /206Pb	% err	Total 207Pb /206Pb	% err	204Pb-corr 207Pb*/235U	% err	204Pb-corr 206Pb*/238U	% err	err corr
Yerington: Jgp1 (untreated)
qmp1_1.1	TJB.12	2014-10-01	168.467	4.18563	90.4117	178.7	0.000356532	70.7153	0.0462412	4.9951	0.151887	5.03535	-0.000218588	-0.403195	0.522637	0.406241	37.9196	2.48936	0.0462412	4.9951	0.147892	11.1148	0.0261982	2.53299	0.227894
qmp1_3.1	TJB.12	2014-10-01	164.962	2.56823	97.5168	199.226	0.00014893	100.003	0.0503542	4.01198	0.176992	4.35384	6.61483e-05	0.122049	0.505632	2.06131	38.5332	1.54941	0.0503542	4.01198	0.171856	6.4055	0.0258803	1.57372	0.245683
qmp1_4.1	TJB.12	2014-10-01	168.014	2.32322	173.888	298.535	8.79386e-05	100.002	0.0491554	3.1234	0.201993	3.14344	-1.97545e-05	-0.0364393	0.601692	0.586101	37.8843	1.38133	0.0491554	3.1234	0.173903	4.42863	0.0263534	1.39086	0.31406
qmp1_5.1	TJB.12	2014-10-01	169.904	2.93687	98.2078	141.951	-0.000188965	100.003	0.0447866	4.89846	0.212133	8.11462	-0.000319589	-0.589424	0.714676	0.89052	37.6645	1.72203	0.0447866	4.89846	0.174755	7.63222	0.0266427	1.7567	0.23017
qmp1_6.1	TJB.12	2014-10-01	169.337	1.9573	93.1403	148.834	0.000227112	100.004	0.0494717	5.17897	0.210037	5.07241	-1.5425e-07	-0.0002845	0.646451	4.02446	37.5708	1.12074	0.0494717	5.17897	0.168538	9.26761	0.0265049	1.19709	0.129169
qmp1_10.1	TJB.12	2014-10-01	172.519	1.70091	631.421	863.029	1e-32	100	0.0492951	1.90901	0.243841	1.71936	-1.67519e-05	-0.0308891	0.755777	0.966407	36.88	0.987627	0.0492951	1.90901	0.184295	2.14935	0.027115	0.987627	0.4595
qmp1_13.1	TJB.12	2014-10-01	170.546	1.47297	302.98	474.572	1e-32	100	0.0477339	2.6836	0.201048	2.59861	-0.000120079	-0.221452	0.659496	1.02687	37.3834	0.856362	0.0477339	2.6836	0.176055	2.81692	0.0267498	0.856362	0.304006
qmp1_14.1	TJB.12	2014-10-01	168.376	1.74751	146.731	190.316	0.00016207	100.003	0.0500513	4.33738	0.228883	4.07533	4.06497e-05	0.0749807	0.79643	2.52405	37.7598	1.01074	0.0500513	4.33738	0.17352	6.87379	0.026404	1.05428	0.153377
qmp1_15.1	TJB.12	2014-10-01	167.778	1.61534	291.268	315.413	0.00029457	57.7381	0.0477601	3.47207	0.300379	2.82085	-0.000114301	-0.210845	0.953925	4.86217	38.0043	0.948635	0.0477601	3.47207	0.156584	7.06071	0.0261698	0.999708	0.141588
qmp1_19.1	TJB.12	2014-10-01	167.195	8.36633	94.5903	156.901	0.0016111	35.3657	0.106519	18.903	0.297274	10.6228	0.00388224	7.16171	0.622762	0.41371	35.3327	4.25074	0.106519	18.903	0.317485	26.9973	0.0274612	4.38661	0.162483
Mean age of coherent group (N=10)			169.26		Probability			0.459156
Age error (95% conf., with error in Std)			1.47722		Age error (95% conf., without error in Std)			1.31805
MSWD			0.973993
Yerington: Jgp1 (treated)
qmp1cata_1.1	TJB.12	2014-10-01	165.914	2.83335	120.499	215.61	0.000550293	50.005	0.0479512	3.96764	0.181692	4.076	-9.86228e-05	-0.181953	0.577318	0.562582	38.4259	1.70572	0.0479512	3.96764	0.141221	11.6118	0.0257599	1.78116	0.153392
qmp1cata_3.1	TJB.12	2014-10-01	170.283	2.4057	129.388	284.069	0.0001907	70.7131	0.0466534	3.352	0.144167	3.8251	-0.000193178	-0.356271	0.47051	1.05485	37.4924	1.41165	0.0466534	3.352	0.160618	5.98174	0.0265783	1.43354	0.239653
qmp1cata_6.1	TJB.12	2014-10-01	168.778	2.92676	1942.65	1196.66	2.25284e-05	100	0.0495012	1.64369	0.55857	11.59	2.65904e-06	0.00490458	1.67696	9.99845	37.695	1.74614	0.0495012	1.64369	0.179778	2.49918	0.0265177	1.74663	0.698883
qmp1cata_7.1	TJB.12	2014-10-01	173.705	1.57026	429.506	374.54	8.4203e-05	100.002	0.0461321	3.16475	0.368302	2.27522	-0.000233593	-0.430681	1.1846	1.94645	36.7713	0.893631	0.0461321	3.16475	0.168049	4.37672	0.0271529	0.907058	0.207246
qmp1cata_8.1	TJB.12	2014-10-01	164.927	1.52075	284.732	384.347	0.000327519	50.003	0.0502601	3.01646	0.23233	2.79304	5.97971e-05	0.110331	0.765268	1.31657	38.546	0.910184	0.0502601	3.01646	0.161485	6.39873	0.0257863	0.959612	0.149969
qmp1cata_9.1	TJB.12	2014-10-01	166.24	2.59116	94.5303	157.794	0.000385598	70.7156	0.0510174	4.58506	0.19181	4.71108	0.000109411	0.20185	0.618843	0.718581	38.2027	1.54425	0.0510174	4.58506	0.162396	10.4837	0.0259899	1.62525	0.155026
qmp1cata_10.1	TJB.12	2014-10-01	169.709	4.20607	121.197	224.339	-0.000140491	100.003	0.0488591	3.98268	0.153326	4.5153	-4.23502e-05	-0.0781084	0.558068	0.355747	37.5166	2.48806	0.0488591	3.98268	0.187629	6.09104	0.026724	2.50145	0.410678
qmp1cata_12.1	TJB.12	2014-10-01	166.736	2.88581	137.842	168.24	2.15378e-12	9999	0.0487409	4.56539	0.255076	7.15301	-4.61009e-05	-0.0850474	0.846357	0.338295	38.1971	1.72316	0.0487409	4.56539	0.17594	4.87976	0.02618	1.72316	0.353124
qmp1cata_13.1	TJB.12	2014-10-01	170.487	4.49937	965.148	973.531	1e-32	100	0.0496276	1.68076	0.341761	1.29212	8.79298e-06	0.0162163	1.02411	4.60583	37.308	2.66017	0.0496276	1.68076	0.18341	3.14666	0.0268039	2.66017	0.845395
qmp1cata_14.1	TJB.12	2014-10-01	168.765	5.67663	45.5971	94.3029	0.000317937	100.006	0.0462993	6.25405	0.163411	6.54226	-0.000215066	-0.396688	0.499474	1.72108	37.8493	3.37343	0.0462993	6.25405	0.150574	13.831	0.0262656	3.42462	0.247605
Mean age of coherent group (N=9)			166.983		Probability			0.709471
Age error (95% conf., with error in Std)			1.90439		Age error (95% conf., without error in Std)			1.78709
MSWD			0.680235
	Mean age of coherent group (N=20*)			168.995		Probability			0.0753853
All Jgp1:	Age error (95% conf., with error in Std)			1.20561		Age error (95% conf., without error in Std)			1.00497
	MSWD			1.49664		*Includes qmp1cata_7.1
Yerington: Jgp1.5 (untreated)
qmp1.5_1.1	TJB.12	2014-10-01	172.691	1.80688	79.1556	173.095	0.000346712	70.7151	0.0458465	4.57967	0.1498	5.07328	-0.000251572	-0.46387	0.472385	0.416553	36.9986	1.02398	0.0458465	4.57967	0.150675	10.4639	0.0268552	1.12051	0.107083
qmp1.5_2.1	TJB.12	2014-10-01	164.086	2.77804	60.5072	155.175	1e-32	100	0.0512641	4.72749	0.13353	5.87114	0.000129284	0.238558	0.402797	0.475653	38.6984	1.68121	0.0512641	4.72749	0.182651	5.01754	0.0258409	1.68121	0.335068
qmp1.5_4.2	TJB.12	2014-10-01	167.875	2.85154	65.1155	150.94	0.000216134	100.004	0.0542148	7.96637	0.139184	5.92275	0.000324527	0.598634	0.445636	1.06992	37.6802	1.62823	0.0542148	7.96637	0.186032	10.6729	0.0264333	1.67671	0.1571
qmp1.5_6.1	TJB.12	2014-10-01	164.766	3.30565	73.1486	186.93	0.000171441	100.003	0.0491599	4.39081	0.13175	5.49516	-1.47812e-05	-0.0272729	0.404228	0.495493	38.637	2.00601	0.0491599	4.39081	0.165877	7.43745	0.0258	2.03095	0.273071
qmp1.5_8.1	TJB.12	2014-10-01	168.608	1.91812	63.6751	149.424	-1.43839e-12	9999	0.046474	5.33915	0.132896	6.16671	-0.000202981	-0.374402	0.4402	1.00545	37.8736	1.10668	0.046474	5.33915	0.16919	5.45263	0.0264036	1.10668	0.202962
qmp1.5_9.1	TJB.12	2014-10-01	168.554	1.75069	836.221	716.509	4.27991e-05	100.001	0.0472026	2.24712	0.385111	1.58854	-0.000153348	-0.282854	1.20559	0.255947	37.8521	1.03965	0.0472026	2.24712	0.169506	2.85048	0.0263978	1.04265	0.36578
qmp1.5_10.1	TJB.12	2014-10-01	167.103	2.51448	109.674	220.13	0.000269476	70.7141	0.0496122	4.07668	0.167727	4.34752	1.26208e-05	0.0232823	0.514666	3.88268	38.071	1.49734	0.0496122	4.07668	0.164436	7.78881	0.0261361	1.53845	0.197521
qmp1.5_24.1	TJB.12	2014-10-01	171.525	1.55453	150.291	326.245	1e-32	100	0.0472781	3.25142	0.147716	3.67017	-0.000152509	-0.281237	0.475871	0.308621	37.1872	0.894761	0.0472781	3.25142	0.175294	3.37229	0.0268909	0.894761	0.265327
qmp1.5_25.1	TJB.12	2014-10-01	166.713	1.48063	263.365	397.356	8.66722e-05	100.002	0.0511726	3.16632	0.213677	6.12064	0.0001193	0.220086	0.684665	1.8017	38.0877	0.873342	0.0511726	3.16632	0.180348	4.2313	0.0262132	0.887905	0.209842
qmp1.5_26.1	TJB.12	2014-10-01	164.546	3.02882	144.833	304.894	0.000104098	100.002	0.0515954	3.38863	0.168676	3.7681	0.000151155	0.278903	0.490702	0.362608	38.5736	1.84393	0.0515954	3.38863	0.178615	5.00495	0.0258747	1.85394	0.370422
Mean age of coherent group (N=10)			168.555		Probability			0.0562178
Age error (95% conf., with error in Std)			1.45654		Age error (95% conf., without error in Std)			1.29627
MSWD			1.83907
Yerington: Jgp1.5 (treated)
qmp1.5cata_2.1	TJB.12	2014-10-01	169.997	1.68398	103.422	224.914	0.000125196	100.002	0.0476086	3.77765	0.154985	4.18181	-0.000127819	-0.235736	0.475002	1.4478	37.5093	0.974728	0.0476086	3.77765	0.167817	5.73902	0.0265985	1.00183	0.174564
qmp1.5cata_3.2	TJB.12	2014-10-01	169.493	1.5854	171.881	308.154	0.000104593	100.002	0.0494195	3.40714	0.191971	3.53195	-3.93063e-06	-0.00724959	0.576182	1.53113	37.5383	0.920665	0.0494195	3.40714	0.175521	4.86842	0.0265881	0.940735	0.193232
qmp1.5cata-4.1	TJB.12	2014-10-01	165.857	3.93785	150.276	277.603	1e-32	100	0.0480543	3.68964	0.170466	3.93356	-9.15334e-05	-0.168874	0.559199	0.756042	38.4328	2.3848	0.0480543	3.68964	0.172398	4.39326	0.0260194	2.3848	0.542832
qmp1.5cata-5.1	TJB.12	2014-10-01	171.948	1.50759	285.166	429.019	8.1529e-05	100.001	0.0463454	3.29147	0.220408	2.98477	-0.000216562	-0.39934	0.686627	0.90994	37.1374	0.864675	0.0463454	3.29147	0.167339	4.40194	0.0268866	0.877686	0.199386
qmp1.5cata-6.1	TJB.12	2014-10-01	169.536	3.32125	167.121	298.179	6.88901e-13	9999	0.051948	3.42653	0.177337	3.70047	0.000167976	0.309811	0.57897	0.311871	37.4123	1.96405	0.051948	3.42653	0.19145	3.9495	0.0267292	1.96405	0.497291
qmp1.5cata-7.1	TJB.12	2014-10-01	171.777	3.38201	144.086	256.507	1e-32	100	0.0489912	3.67432	0.18458	3.76864	-3.63563e-05	-0.067042	0.580258	0.324792	37.0542	1.97404	0.0489912	3.67432	0.182298	4.17103	0.0269875	1.97404	0.473275
qmp1.5cata-8.1	TJB.12	2014-10-01	166.34	1.68511	146.189	214.416	1e-32	100	0.0513276	3.62055	0.220442	4.00029	0.000130371	0.240518	0.704301	0.340176	38.1666	0.99587	0.0513276	3.62055	0.185425	3.75501	0.0262009	0.99587	0.265211
qmp1.5cata_10.1	TJB.12	2014-10-01	162.424	3.2981	66.9722	133.942	-2.73821e-21	9999	0.0537187	4.41479	0.150784	6.0072	0.000298578	0.55102	0.516509	0.816193	38.9796	2.02665	0.0537187	4.41479	0.190016	4.85775	0.0256544	2.02665	0.4172
qmp1.5cata_12.1	TJB.12	2014-10-01	167.704	2.83224	278.166	381.477	1e-32	100	0.0488608	2.84963	0.239696	2.60083	-3.93456e-05	-0.0725792	0.753244	0.226872	37.9684	1.69494	0.0488608	2.84963	0.177435	3.3156	0.0263377	1.69494	0.511203
qmp1.5cata_15.1	TJB.12	2014-10-01	166.769	2.13697	384.734	469.291	-5.79221e-05	100.002	0.0482405	2.49297	0.266441	2.50115	-8.01836e-05	-0.147923	0.846874	0.392086	38.2122	1.28405	0.0482405	2.49297	0.177329	3.26419	0.0261976	1.28848	0.394731
Mean age of coherent group (N=10)			168.886		Probability			0.14535
Age error (95% conf., with error in Std)			1.49912		Age error (95% conf., without error in Std)			1.34329
MSWD			1.48882
	Mean age of coherent group (N=20)			168.714		Probability			0.0508275
All Jgp1.5:	Age error (95% conf., with error in Std)			1.14548		Age error (95% conf., without error in Std)			0.93278
	MSWD			1.583
Yerington: Jgp2 (untreated)
qmp2_1.1	TJB.12	2014-10-01	163.955	1.53653	105.647	244.128	0.000116956	100.002	0.0512487	3.52921	0.141927	4.25293	0.000128429	0.236983	0.447033	0.779188	38.7303	0.918559	0.0512487	3.52921	0.175943	5.13728	0.0257638	0.943679	0.183692
qmp2_2.1	TJB.12	2014-10-01	170.802	1.88107	204.024	344.237	-0.000155314	70.7127	0.0461264	3.06057	0.183057	3.07056	-0.000229794	-0.42378	0.612243	0.566666	37.3988	1.09757	0.0461264	3.06057	0.178999	4.55998	0.0268154	1.116	0.244737
qmp2_3.1	TJB.12	2014-10-01	170.329	1.83406	48.5864	131.459	1e-32	100	0.0493394	4.62211	0.111551	6.50478	-1.05793e-05	-0.019511	0.38179	3.2474	37.3562	1.04958	0.0493394	4.62211	0.182109	4.73978	0.0267693	1.04958	0.22144
qmp2_4.1	TJB.12	2014-10-01	172.656	3.8283	85.834	179.214	1e-32	100	0.048461	3.93019	0.15604	7.22495	-7.36873e-05	-0.135871	0.494751	0.367906	36.888	2.22491	0.048461	3.93019	0.181138	4.51626	0.0271091	2.22491	0.492644
qmp2_5.1	TJB.12	2014-10-01	172.307	5.07398	269.488	421.088	5.22085e-05	100.001	0.0488443	2.41082	0.203724	5.86358	-4.71115e-05	-0.0868709	0.6611	3.41763	36.9461	2.96753	0.0488443	2.41082	0.17924	4.17019	0.0270404	2.96909	0.711979
qmp2_6.1	TJB.12	2014-10-01	169.947	1.42205	251.611	397.899	1e-32	100	0.0505525	2.58453	0.21183	2.56705	7.24749e-05	0.133666	0.653217	0.799655	37.3852	0.828709	0.0505525	2.58453	0.186442	2.71414	0.0267486	0.828709	0.305331
qmp2_7.1	TJB.12	2014-10-01	163.948	2.66717	136.747	289.878	0.000165468	70.7128	0.0536603	3.17342	0.158417	3.45693	0.000292433	0.53961	0.487308	0.327405	38.6171	1.62718	0.0536603	3.17342	0.182364	5.01074	0.0258162	1.64153	0.327602
qmp2_9.1	TJB.12	2014-10-01	168.005	1.46438	247.249	408.074	0.000108013	70.7121	0.0479594	2.6464	0.192212	2.5841	-0.000101085	-0.186463	0.625886	0.224553	37.9416	0.865353	0.0479594	2.6464	0.168154	3.77217	0.0263037	0.876792	0.232437
Mean age of coherent group (N=7)			169.323		Probability			0.310503
Age error (95% conf., with error in Std)			1.63882		Age error (95% conf., without error in Std)			1.49682
MSWD			1.18554
Yerington: Jgp2 (treated)
qmp2cata_1.1	TJB.12	2014-10-01	169.293	1.56576	174.365	340.639	0.000167517	70.7128	0.0516049	3.00125	0.169972	3.29721	0.000144993	0.267427	0.528767	0.611255	37.4822	0.913302	0.0516049	3.00125	0.180207	4.85081	0.0265969	0.939229	0.193623
qmp2cata_2.1	TJB.12	2014-10-01	164.559	3.11198	254.556	414.907	1e-32	100	0.0506038	5.58284	0.192196	2.88282	8.3706e-05	0.15445	0.633772	0.233949	38.6174	1.87535	0.0506038	5.58284	0.180676	5.8894	0.025895	1.87535	0.318429
qmp2cata_3.1	TJB.12	2014-10-01	171.349	2.29107	120.633	259.09	-0.000299448	57.7382	0.0515007	3.31633	0.148609	6.53451	0.000134946	0.248853	0.480966	1.20892	37.0332	1.33246	0.0515007	3.31633	0.209156	5.59226	0.0271519	1.36967	0.244923
qmp2cata_4.1	TJB.12	2014-10-01	172.689	2.18474	155.569	265.288	-9.55256e-05	100.002	0.0466215	3.33251	0.208743	3.2403	-0.000198856	-0.366668	0.605768	1.17971	36.964	1.26221	0.0466215	3.33251	0.179468	4.53943	0.027101	1.2744	0.28074
qmp2cata_5.1	TJB.12	2014-10-01	167.638	2.92015	234.496	360.359	6.96137e-05	100.001	0.047069	2.86723	0.219766	2.66784	-0.00016111	-0.297194	0.672202	0.250122	38.067	1.74931	0.047069	2.86723	0.166548	4.08532	0.0262357	1.75403	0.429349
qmp2cata_6.1	TJB.12	2014-10-01	168.409	2.69301	104.936	208.917	7.11324e-13	9999	0.0472034	6.09706	0.158098	4.01424	-0.000153081	-0.282366	0.518862	0.825542	37.8849	1.57408	0.0472034	6.09706	0.171794	6.29697	0.0263957	1.57408	0.249974
qmp2cata_8.1	TJB.12	2014-10-01	169.071	2.04152	135.821	262.01	0.00018876	70.7131	0.0498313	3.23791	0.166079	3.5226	2.46858e-05	0.0455317	0.53549	0.812109	37.6138	1.20184	0.0498313	3.23791	0.171859	5.5662	0.0264935	1.22697	0.220432
qmp2cata_10.1	TJB.12	2014-10-01	166.458	3.52299	48.8479	128.236	0.00017125	100.003	0.0469824	4.45057	0.121135	5.74132	-0.000165301	-0.304956	0.393493	1.64367	38.3432	2.11933	0.0469824	4.45057	0.159329	7.71844	0.0259978	2.1429	0.277634
Mean age of coherent group (N=8)			169.304		Probability			0.469354
Age error (95% conf., with error in Std)			1.77184		Age error (95% conf., without error in Std)			1.64142
MSWD			0.945889
	Mean age of coherent group (N=16*)			168.701		Probability			0.0568212
All Jgp2:	Age error (95% conf., with error in Std)			1.23501		Age error (95% conf., without error in Std)			1.04081
	MSWD			1.63445		*Includes qmp2_1.1 because statistically the age was not affected by inclusion of qmp2_1.1
Yerington: Jgp3 (untreated)
qmp3_5.1	TJB.12	2014-10-01	168.06	2.98459	98.0242	223.775	1e-32	100	0.0498137	3.51281	0.147171	4.12206	0.000172036	0.317343	0.452504	0.342587	37.8429	1.77845	0.0498137	3.51281	0.181496	3.93735	0.0264251	1.77845	0.451686
qmp3_6.1	TJB.12	2014-10-01	170.225	3.14853	159.057	300.748	-9.16217e-05	100.002	0.0496191	3.17675	0.164092	3.55439	-4.34043e-05	-0.0800457	0.546323	0.899412	37.3663	1.85589	0.0496191	3.17675	0.188372	4.46608	0.0268073	1.86354	0.417265
qmp3_7.1	TJB.12	2014-10-01	171.095	1.30275	1137.17	1141.61	1e-32	100	0.0497074	1.59631	0.324113	1.27826	-1.81069e-05	-0.0334028	1.02898	0.442637	37.1707	0.761964	0.0497074	1.59631	0.184384	1.76884	0.0269029	0.761964	0.430771
qmp3_8.1	TJB.12	2014-10-01	168.695	1.39386	272.225	435.191	-5.68384e-05	100.001	0.0521528	2.49704	0.199011	5.07029	-0.000212806	-0.392383	0.646172	1.89568	37.5908	0.817897	0.0521528	2.49704	0.194548	3.02811	0.0266301	0.824575	0.272307
qmp3_17.1	TJB.12	2014-10-01	167.903	1.63654	119.4	256.319	0.000420536	50.0038	0.0519732	5.60884	0.153564	3.91701	2.49444e-05	0.0460125	0.481199	0.32388	37.7781	0.915253	0.0519732	5.60884	0.165718	9.43498	0.026265	0.995245	0.105485
qmp3_18.1	TJB.12	2014-10-01	170.73	2.50656	167.753	256.366	-0.000183332	70.713	0.0488653	3.22348	0.208429	6.64302	8.59359e-06	0.0158489	0.675942	0.271051	37.2892	1.46847	0.0488653	3.22348	0.19127	4.99956	0.0269081	1.48767	0.297561
qmp3_19.1	TJB.12	2014-10-01	167.055	3.10353	279.855	406.904	1e-32	100	0.0491594	2.63176	0.230689	3.98453	1.33447e-05	0.0246094	0.710463	1.82737	38.1032	1.86716	0.0491594	2.63176	0.177888	3.22684	0.0262445	1.86716	0.578636
qmp3_20.1	TJB.13	2014-11-01	172.887	1.37618	410.139	516.672	1e-32	100	0.0464206	2.24575	0.258272	1.92066	0.000183111	0.33775	0.820004	1.05964	36.9304	0.792935	0.0464206	2.24575	0.173312	2.38163	0.027078	0.792935	0.332938
Mean age of coherent group (N=8)			170.134		Probability			0.248972
Age error (95% conf., with error in Std)			1.43683		Age error (95% conf., without error in Std)			1.27082
MSWD			1.29309
Yerington: Jgp3 (treated)
qmp3cata-7.1	TJB.12	2014-10-01	166.55	1.54064	148.521	304.597	1e-32	100	0.0510426	2.97215	0.162151	3.36159	0.000110683	0.204192	0.50369	0.486715	38.1297	0.913244	0.0510426	2.97215	0.184574	3.10929	0.0262263	0.913244	0.293715
qmp3cata-6.1	TJB.12	2014-10-01	167.796	1.48805	212.452	350.123	-6.28976e-05	100.001	0.048948	2.73172	0.193855	4.40063	-3.35492e-05	-0.0618863	0.626818	2.70778	37.9439	0.878615	0.048948	2.73172	0.181436	3.37414	0.0263853	0.886225	0.262652
qmp3cata-4.1	TJB.12	2014-10-01	168.021	3.48398	43.593	125.948	0.000600661	57.7413	0.0528271	4.62059	0.111717	6.32939	0.000229923	0.424119	0.357542	2.79186	37.7083	2.0687	0.0528271	4.62059	0.158861	13.2658	0.0262255	2.1675	0.16339
qmp3cata-10.1	TJB.12	2014-10-01	169.751	2.22295	108.432	244.661	0.000172887	70.7129	0.0484217	3.12925	0.147371	3.59566	-7.21582e-05	-0.133084	0.45782	1.03811	37.5278	1.30724	0.0484217	3.12925	0.167985	5.32375	0.0265619	1.32666	0.249197
qmp3cata-2.1	TJB.12	2014-10-01	170.824	1.65027	461.55	529.857	4.9494e-05	100.001	0.0484254	2.41333	0.271446	2.01201	-7.34539e-05	-0.135462	0.899831	0.982027	37.2898	0.963475	0.0484254	2.41333	0.176196	3.04867	0.0267925	0.967797	0.317449
qmp3cata-1.1	TJB.12	2014-10-01	171.305	1.48543	160.151	341.733	7.41853e-05	100.001	0.0516746	2.82038	0.160373	3.18645	0.000146826	0.270762	0.484109	0.273163	37.0329	0.85533	0.0516746	2.82038	0.18808	3.70464	0.0269661	0.866232	0.233824
qmp3cata-3.1	TJB.12	2014-10-01	172.547	2.36855	574.878	684.182	9.43445e-05	57.736	0.0499561	1.85753	0.27742	1.58378	2.81644e-05	0.0519325	0.867969	0.347306	36.8434	1.37994	0.0499561	1.85753	0.181438	2.88327	0.0270947	1.38361	0.479874
Mean age of coherent group (N=7)			169.39		Probability			0.178092
Age error (95% conf., with error in Std)			1.51678		Age error (95% conf., without error in Std)			1.36199
MSWD			1.48677
	Mean age of coherent group (N=15)			169.788		Probability			0.180446
All Jgp3:	Age error (95% conf., with error in Std)			1.145		Age error (95% conf., without error in Std)			0.929163
	MSWD			1.32919
Yerington: Jbqm (untreated)
bqm_1.1	TJB.12	2014-10-01	166.853	2.63167	120.123	168.094	1e-32	100	0.0473907	4.57266	0.256137	3.892	-0.000138103	-0.25477	0.738202	0.931048	38.2325	1.5686	0.0473907	4.57266	0.170908	4.83422	0.0261558	1.5686	0.324477
bqm_2.1	TJB.12	2014-10-01	169.858	1.79089	106.577	178.352	-0.000154674	100.003	0.0457801	5.0507	0.190707	7.64224	-0.000251979	-0.464731	0.617285	5.37957	37.6244	1.02538	0.0457801	5.0507	0.17662	6.81908	0.0266543	1.0641	0.156048
bqm_3.1	TJB.12	2014-10-01	168.335	2.00174	63.9063	103.843	0.000980748	50.0089	0.0493477	5.29285	0.181413	5.44492	-7.14513e-06	-0.0131796	0.635718	0.91042	37.8023	1.15586	0.0493477	5.29285	0.124125	22.9579	0.0259749	1.47814	0.0643847
bqm_4.1	TJB.12	2014-10-01	166.314	1.49375	240.726	315.33	9.19356e-05	100.002	0.0521142	3.1404	0.239685	2.94781	0.000183906	0.339284	0.788602	0.251241	38.1355	0.883176	0.0521142	3.1404	0.183229	4.28146	0.0261778	0.89937	0.210062
bqm_6.1	TJB.12	2014-10-01	168.084	1.55577	183.216	262.934	0.000104919	100.002	0.0495137	3.4253	0.221036	3.27374	4.5049e-06	0.00830974	0.719807	0.589781	37.8514	0.910128	0.0495137	3.4253	0.174393	4.88263	0.026368	0.930556	0.190585
bqm_7.1	TJB.12	2014-10-01	171.211	2.72017	119.432	433.659	1e-32	100	0.0516413	2.49031	0.0927898	3.6755	0.000144714	0.266869	0.284494	0.619407	37.0571	1.59505	0.0516413	2.49031	0.192144	2.95733	0.0269854	1.59505	0.539354
bqm_8.1	TJB.12	2014-10-01	170.644	1.61605	67.0156	226.771	1e-32	100	0.0473622	3.7181	0.0950954	5.19068	-0.000145516	-0.268361	0.305274	0.406728	37.3773	0.930745	0.0473622	3.7181	0.174713	3.83283	0.0267542	0.930745	0.242835
bqm_9.1	TJB.12	2014-10-01	171.969	2.29531	219.299	363.632	0.000161361	70.7128	0.0484168	3.1231	0.197811	6.55142	-7.5698e-05	-0.139587	0.622981	0.26278	37.0386	1.33378	0.0484168	3.1231	0.170856	5.11442	0.0269185	1.35038	0.264033
Mean age of coherent group (N=8)			168.871		Probability			0.337588
Age error (95% conf., with error in Std)			1.485		Age error (95% conf., without error in Std)			1.32754
MSWD			1.13481
Yerington: Jbqm (treated)
bqmcata_1.1	TJB.12	2014-10-01	228.838	2.77235	86.6686	312.525	7.02927e-05	100.001	0.0508332	2.78702	0.0904671	7.53314	5.138e-06	0.00942892	0.286469	0.690108	27.6706	1.21317	0.0508332	2.78702	0.247829	3.73067	0.0360928	1.22003	0.327026
bqmcata_9.1	TJB.12	2014-10-01	230.86	4.35156	66.1728	210.346	0.000207679	70.7133	0.0501084	3.43431	0.0946393	4.92029	-4.72675e-05	-0.0867272	0.324972	0.434751	27.4498	1.89534	0.0501084	3.43431	0.235408	6.20543	0.0362913	1.91455	0.308528
bqmcata_10.1	TJB.12	2014-10-01	173.877	2.58554	69.6778	966.636	1e-32	100	0.0494056	1.82365	0.0231785	5.37095	-1.12017e-05	-0.0206525	0.0744615	0.393876	36.5842	1.4963	0.0494056	1.82365	0.186202	2.35895	0.0273342	1.4963	0.63431
bqmcata_11.1	TJB.12	2014-10-01	166.814	2.28185	50.9413	91.8511	1e-32	100	0.0482397	6.06702	0.189167	6.09843	-8.03027e-05	-0.148142	0.572909	0.515476	38.2019	1.33225	0.0482397	6.06702	0.174109	6.21157	0.0261767	1.33225	0.214479
bqmcata_12.1	TJB.12	2014-10-01	169.308	2.47055	113.218	222.427	-0.000131836	100.002	0.0484279	3.93123	0.148806	5.00479	-7.11006e-05	-0.131139	0.525811	1.26823	37.6254	1.45338	0.0484279	3.93123	0.185011	5.57701	0.0266424	1.47348	0.264206
bqmcata_13.1	TJB.12	2014-10-01	170.718	1.40894	382.926	516.477	-5.73563e-05	100.001	0.0476076	2.60806	0.235502	2.34405	-0.000128928	-0.237768	0.765886	1.13935	37.3496	0.81859	0.0476076	2.60806	0.179055	3.20402	0.0268024	0.825381	0.257608
bqmcata_14.1	TJB.12	2014-10-01	172.794	3.72207	55.4993	107.946	0.000267325	100.005	0.0469341	5.62012	0.158536	6.19055	-0.000177743	-0.327735	0.531104	0.491287	36.9273	2.14922	0.0469341	5.62012	0.159656	11.3501	0.0269467	2.20557	0.194322
bqmcata_15.1	TJB.12	2014-10-01	173.373	2.22017	65.7525	118.338	0.000434943	70.7163	0.053983	9.68063	0.183646	5.11158	0.000300877	0.554751	0.573968	0.908735	36.4852	1.11934	0.053983	9.68063	0.178336	14.7142	0.0271886	1.25688	0.0854198
Mean age of coherent group (N=6)			170.858		Probability			0.268314
Age error (95% conf., with error in Std)			1.89144		Age error (95% conf., without error in Std)			1.76754
MSWD			1.28207
	Mean age of coherent group (N=14)			169.588		Probability			0.173814
All Jbqm:	Age error (95% conf., with error in Std)			1.25435		Age error (95% conf., without error in Std)			1.06149
	MSWD			1.35289
Yerington: Jpg (untreated)
pqm_2.1	TJB.12	2014-10-01	169.419	2.24534	171.061	352.761	0.000315323	50.0029	0.0475292	3.03862	0.161118	3.31978	-0.000132382	-0.244164	0.500922	1.35416	37.6422	1.32521	0.0475292	3.03862	0.156058	6.59093	0.0264114	1.35711	0.205905
pqm_5.1	TJB.12	2014-10-01	169.873	1.46495	390.48	1293.48	2.39814e-05	100	0.0483405	2.9282	0.102085	2.26268	-7.78631e-05	-0.143605	0.311845	0.451457	37.5032	0.852479	0.0483405	2.9282	0.176346	3.15911	0.0266526	0.853627	0.270211
pqm_6.1	TJB.12	2014-10-01	167.424	1.81582	262.336	423.285	-6.63473e-05	100.001	0.0490733	2.73773	0.200709	2.73072	-2.44945e-05	-0.0451851	0.640215	0.494549	38.0226	1.08149	0.0490733	2.73773	0.18171	3.48687	0.0263323	1.08838	0.312135
pqm_9.1	TJB.12	2014-10-01	170.807	1.91156	312.059	502.968	1e-32	100	0.0478268	2.27736	0.201722	2.22377	-0.00011415	-0.210512	0.640909	0.200579	37.3199	1.12113	0.0478268	2.27736	0.176698	2.53837	0.0267954	1.12113	0.441674
pqm_10.1	TJB.12	2014-10-01	452.141	6.58105	81.1909	138.08	-0.000140321	100.001	0.0535681	2.64988	0.190707	2.78922	-0.0001693	-0.304646	0.607401	0.381799	13.7825	1.67172	0.0535681	2.64988	0.557778	4.77722	0.0727387	1.69058	0.353884
Mean age of coherent group (N=4)			169.413		Probability			0.607359
Age error (95% conf., with error in Std)			1.91642		Age error (95% conf., without error in Std)			1.79637
MSWD			0.611652
Yerington: Jpg (treated)
pqmcata_1.1	TJB.12	2014-10-01	171.017	1.55567	114.757	250.088	9.95117e-05	100.002	0.0503401	3.30012	0.160794	3.72748	5.64876e-05	0.104171	0.474007	0.312415	37.1589	0.894706	0.0503401	3.30012	0.181023	4.63035	0.0268621	0.913401	0.197264
pqmcata_2.1	TJB.12	2014-10-01	168.253	6.0469	44.6994	132.243	0.000213856	100.004	0.0481367	4.93212	0.120798	6.40068	-8.9387e-05	-0.164881	0.349164	0.518901	37.8771	3.61361	0.0481367	4.93212	0.163069	9.54692	0.0262971	3.63525	0.380777
pqmcata_3.1	TJB.12	2014-10-01	162.997	1.68535	106.897	211.5	1e-32	100	0.0503296	3.72239	0.159704	4.16184	6.72968e-05	0.124189	0.522102	0.345615	39.004	1.01698	0.0503296	3.72239	0.177916	3.85881	0.0256384	1.01698	0.263547
pqmcata_6.1	TJB.12	2014-10-01	167.189	1.93455	71.2123	171.015	0.000370575	70.7154	0.0505645	9.04121	0.132875	5.52392	7.72615e-05	0.142527	0.43015	3.27503	38.0067	1.02281	0.0505645	9.04121	0.162442	13.4313	0.0261313	1.13272	0.0843345
pqmcata_8.1	TJB.12	2014-10-01	169.324	1.53419	218.598	379.031	0.000158354	70.7127	0.0474869	5.25186	0.211638	3.16074	-0.000135127	-0.249229	0.595762	2.22303	37.6653	0.861445	0.0474869	5.25186	0.164781	6.70873	0.0264721	0.885998	0.132067
Mean age of coherent group (N=4)			169.417		Probability			0.491921
Age error (95% conf., with error in Std)			1.99889		Age error (95% conf., without error in Std)			1.8841
MSWD			0.803075
	Mean age of coherent group (N=8)			169.415		Probability			0.751262
All Jpg:	Age error (95% conf., with error in Std)			1.46153		Age error (95% conf., without error in Std)			1.30013
	MSWD			0.606313
Yerington: Jqmd (untreated)
gd_1.1	TJB.12	2014-10-01	168.243	1.3286	1450.46	886.114	1e-32	100	0.0487481	1.91655	0.551944	2.74381	-4.77916e-05	-0.0881552	1.6909	2.34331	37.851	0.788296	0.0487481	1.91655	0.177575	2.07234	0.0264194	0.788296	0.38039
gd_2.1	TJB.12	2014-10-01	163.176	3.59695	88.0042	229.597	0.00078115	37.8018	0.0504804	6.37898	0.125678	4.38728	7.73008e-05	0.142648	0.395948	1.53991	38.9536	2.18749	0.0504804	6.37898	0.135498	14.4211	0.0253015	2.25627	0.156456
gd_3.1	TJB.12	2014-10-01	170.653	1.56212	350.867	389.114	-7.36899e-05	100.001	0.0502152	3.11922	0.315422	2.63022	4.8521e-05	0.0894826	0.931465	5.09636	37.2446	0.903189	0.0502152	3.11922	0.190158	3.8161	0.026886	0.913329	0.239336
gd_4.1	TJB.12	2014-10-01	171.048	1.38564	708.611	715.851	-3.77778e-05	100.001	0.0491154	2.05802	0.318652	2.89569	-2.68523e-05	-0.0495195	1.02255	2.80138	37.2079	0.807799	0.0491154	2.05802	0.184191	2.45791	0.0268947	0.810793	0.32987
gd_5.1	TJB.12	2014-10-01	169.552	1.35739	547.393	593.937	0.000344558	35.3576	0.0477713	2.22268	0.300614	1.79062	-0.000116111	-0.214151	0.952049	0.166963	37.6012	0.797061	0.0477713	2.22268	0.155441	5.01263	0.0264259	0.828517	0.165286
Mean age of coherent group (N=5)			169.552		Probability			0.217159
Age error (95% conf., with error in Std)			1.52918		Age error (95% conf., without error in Std)			1.37548
MSWD			1.44199
Yerington: Jqmd (treated)
gdcata_2.1	TJB.12	2014-10-01	171.555	3.23946	226.556	458.742	-8.89654e-05	70.7118	0.0498611	5.07883	0.146027	4.75037	2.3135e-05	0.0426624	0.510162	3.09444	37.063	1.8795	0.0498611	5.07883	0.19066	5.58614	0.0270253	1.88307	0.337097
gdcata_3.1	TJB.12	2014-10-01	104.139	1.31462	1465.78	2188.93	-1.94785e-05	100	0.0493389	2.67186	0.224002	1.42181	8.27612e-05	0.153478	0.691729	1.69046	61.3118	1.25896	0.0493389	2.67186	0.111639	2.9951	0.016316	1.25947	0.420512
gdcata_4.1	TJB.12	2014-10-01	100.563	0.764641	1717.04	1701.85	1e-32	100	0.0470586	3.24297	0.328476	1.32394	-6.71098e-05	-0.12449	1.04222	0.381859	63.6814	0.741204	0.0470586	3.24297	0.101889	3.3266	0.0157032	0.741204	0.222812
gdcata_7.1	TJB.12	2014-10-01	172.708	1.82799	874.666	736.553	-6.93842e-13	9999	0.0494326	2.03568	0.37615	2.80013	-7.67705e-06	-0.0141556	1.2267	1.09836	36.8329	1.06073	0.0494326	2.03568	0.185045	2.29546	0.0271496	1.06073	0.462098
gdcata_11.1	TJB.12	2014-10-01	175.173	1.8431	1860.28	1099.62	1e-32	100	0.0495602	1.60817	0.549982	2.70013	-2.55795e-06	-0.00471559	1.74757	1.89405	36.3042	1.05718	0.0495602	1.60817	0.188225	1.92454	0.027545	1.05718	0.549319
Mean age of coherent group (N=3)			173.602		Probability			0.505486
Age error (95% conf., with error in Std)			2.50568		Age error (95% conf., without error in Std)			2.41048
MSWD			0.682236
	Mean age of coherent group (N=7*)			170.004		Probability			0.196434
All Jqmd:	Age error (95% conf., with error in Std)			1.42949		Age error (95% conf., without error in Std)			1.26278
	MSWD			1.43578		*Does not include gdcata_11.1
Mt. Dromedary (untreated)
MtD_27.2	TJB.12	2014-10-01	102.882	1.86193	1374.86	1534.92	-3.00025e-06	100.001	0.0442946	2.043	0.297137	1.60105	-0.00025795	-0.478409	0.925279	0.591622	62.4573	1.81595	0.0442946	2.043	0.0978877	2.73364	0.0160118	1.81596	0.664302
MtD_28.1	TJB.12	2014-10-01	97.0863	1.22037	125.305	360.415	0.000136703	70.7145	0.053039	6.60523	0.119806	5.26352	0.000343614	0.637593	0.359142	0.333359	65.4799	1.18276	0.053039	6.60523	0.107186	7.52103	0.0152331	1.19635	0.159067
MtD_29.1	TJB.12	2014-10-01	101.326	1.44108	372.102	505.453	-0.000111487	100	0.0454855	3.62556	0.241973	6.6717	-0.00017495	-0.324515	0.760469	0.868905	63.3268	1.41469	0.0454855	3.62556	0.102827	5.13403	0.0158238	1.42966	0.278467
MtD_31.2	TJB.12	2014-10-01	95.9342	1.15302	224.434	348.119	-0.000169493	9999	0.0528794	3.521	0.234968	3.87201	0.000334356	0.620474	0.66598	0.266858	66.2836	1.18463	0.0528794	3.521	0.115505	446.596	0.0151341	31.3739	0.0702511
Mean age of coherent group (N=4)			98.384		Probability			0.00133957
Age error (95% conf., with error in Std)			4.92915		Age error (95% conf., without error in Std)			4.90719
MSWD			5.21562
Mt. Dromedary (treated)
MtDC_24.1	TJB.12	2014-10-01	100.122	1.39859	68.2121	184.476	-0.000584881	91.1889	0.0443608	10.3447	0.119011	7.2716	-0.000249632	-0.463088	0.381962	0.440489	64.1828	1.28097	0.0443608	10.3447	0.114927	17.0066	0.0157495	1.61211	0.094793
MtDC_25.1	TJB.12	2014-10-01	99.2438	1.77876	112.273	357.714	-1.28251e-05	2156.57	0.0486855	4.05875	0.0983975	5.667	4.51492e-05	0.0837616	0.324219	0.342821	64.4026	1.7843	0.0486855	4.05875	0.10466	9.4396	0.015531	1.85658	0.19668
MtDC_26.2	TJB.12	2014-10-01	100.088	1.80688	278.788	442.139	-0.000131904	72.5814	0.0485273	3.71965	0.209186	3.56613	3.3245e-05	0.0616724	0.651352	0.239522	63.8691	1.8004	0.0485273	3.71965	0.109209	4.8713	0.0156953	1.8091	0.371379
MtDC_27.1	TJB.12	2014-10-01	100.282	1.46934	253.792	653.311	-2.61829e-05	389.992	0.0490621	2.77462	0.121156	4.03978	6.92852e-05	0.128528	0.40129	0.245989	63.7023	1.46284	0.0490621	2.77462	0.107077	4.35435	0.0157056	1.47504	0.338751
Mean age of coherent group (N=4)			99.988		Probability			0.973078
Age error (95% conf., with error in Std)			1.6517		Age error (95% conf., without error in Std)			1.58274
MSWD			0.0757445
	Mean age of coherent group (N=8)			99.0597		Probability			0.0108839
All Mt. Drom.:	Age error (95% conf., with error in Std)			2.01626		Age error (95% conf., without error in Std)			1.96121
	MSWD			2.60741

## Sheet: S5 Oxygen
Table S5. Yerington in situ zircon oxygen isotope compositions
Spot Name	Mount	Date	16O Measured	16O Error	18O Measured	18O Error	δ18O Raw	δ18O Error	18O/16O Measured	18O/16O Error	Corrected 18O/16O	Corrected δ18O (‰)	Total Error	Internal Error (1σ)		*16O and 18O values are ion counts detected over SIMS run time. See Trail et al., 2007 for SIMS methodology
													(2σ SE)			**1σ error is from error in the standard R33
Jgp1 (untreated)																***Total error includes analitical error and reproducibility error
q1@3.ais	TJB.12	Dec. 2014	3511320000	7585925	7061137	14719.3	2.87516	0.107704	0.00201096	2.1659e-07	0.00201651	5.64239	0.675658	0.107704
q1@5.ais	TJB.12	Dec. 2014	3523047000	6938794	7087215	13341.8	3.22843	0.0905011	0.00201167	1.82058e-07	0.00201722	5.9966	0.665488	0.0905011
q1@6.ais	TJB.12	Dec. 2014	3549104000	8040203	7138379	16043.9	3.05159	0.0560185	0.00201132	1.12671e-07	0.00201687	5.81989	0.650127	0.0560185
q1@7.ais	TJB.12	Dec. 2014	3713278000	10420390	7459185	20531.6	1.78978	0.0682101	0.00200879	1.3702e-07	0.00201433	4.55393	0.65477	0.0682101
q1@8.ais	TJB.12	Dec. 2014	3520416000	6178504	7081406	12266.9	3.15462	0.104658	0.00201153	2.10523e-07	0.00201708	5.92326	0.67374	0.104658
q1@14.ais	TJB.12	Dec. 2014	3549145000	6082181	7137127	11932.7	2.8643	0.065517	0.00201094	1.31751e-07	0.00201649	5.63186	0.653669	0.065517
q1@15.ais	TJB.12	Dec. 2014	3523868000	7102331	7088393	14240.3	3.1607	0.0311813	0.00201154	6.27224e-08	0.00201709	5.92939	0.64343	0.0311813
q1@16.ais	TJB.12	Dec. 2014	3550161000	6901181	7139427	13244.8	2.90088	0.105465	0.00201101	2.12092e-07	0.00201657	5.66805	0.674243	0.105465
q1@17.ais	TJB.12	Dec. 2014	3550214000	6796656	7139179	13033.8	2.85097	0.113336	0.00201092	2.27908e-07	0.00201647	5.6181	0.679332	0.113336
q1@19.ais	TJB.12	Dec. 2014	3548886000	6278957	7134559	12022.3	2.5769	0.112268	0.00201037	2.25701e-07	0.00201591	5.34339	0.678623	0.112268
q1@20.ais	TJB.12	Dec. 2014	3539100000	7390492	7114759	14164.6	2.55951	0.13043	0.00201033	2.62208e-07	0.00201588	5.32551	0.691492	0.13043
q1@24.ais	TJB.12	Dec. 2014	3548641000	5958531	7133280	11681.7	2.46608	0.104089	0.00201014	2.09233e-07	0.00201569	5.23256	0.673387	0.104089
q1@30.ais	TJB.12	Dec. 2014	3561130000	7232951	7162105	14319.1	2.98703	0.048298	0.00201119	9.71365e-08	0.00201674	5.755	0.647645	0.048298
q1@28.ais	TJB.12	Dec. 2014	3533785000	7677606	7107470	15560.9	3.03749	0.0967366	0.00201129	1.94565e-07	0.00201684	5.80608	0.668988	0.0967366
q1@29.ais	TJB.12	Dec. 2014	3538569000	5936512	7114214	11636.1	2.63247	0.0840016	0.00201048	1.68883e-07	0.00201603	5.39935	0.662071	0.0840016	1s pop SD	0.367933
Jgp1 (treated)
q1cata@14.ais	TJB.12	Dec. 2014	3450523000	5969434	6940507	11965.2	3.11016	0.0381864	0.00201144	7.68095e-08	0.00201699	5.8787	0.644938	0.0381864
q1cata@13.ais	TJB.12	Dec. 2014	3545527000	6827506	7128962	13370.4	2.73937	0.0672986	0.00201069	1.35317e-07	0.00201624	5.50641	0.654392	0.0672986
q1cata@3.ais	TJB.12	Dec. 2014	3524150000	6775036	7085121	13503.8	2.61733	0.0607598	0.00201045	1.22155e-07	0.002016	5.3846	0.651828	0.0607598
q1cata@9.ais	TJB.12	Dec. 2014	1699073000	1040067	3389870	1999.23	-5.02223	0.218969	0.00199513	4.36872e-07	0.00200064	-2.27616	0.775824	0.218969
q1cata@11.ais	TJB.12	Dec. 2014	3536306000	11783720	7085791	23029	-0.733386	0.111939	0.00200373	2.24295e-07	0.00200926	2.02335	0.678405	0.111939	1s pop SD	0.257414		All qp1 SD	0.345409
Jgp1.5 (untreated)
q1.5@2.ais	TJB.12	Dec. 2014	3482542000	7442671	7005739	14272.5	3.22959	0.107703	0.00201167	2.16663e-07	0.00201723	5.99757	0.675657	0.107703
q1.5@3.ais	TJB.12	Dec. 2014	3570052000	8330317	7174462	16357.4	2.20672	0.0662082	0.00200962	1.33054e-07	0.00201517	4.97241	0.653947	0.0662082
q1.5@4.ais	TJB.12	Dec. 2014	3524312000	7076904	7088201	13945.4	3.00758	0.0814285	0.00201123	1.63771e-07	0.00201678	5.77542	0.660784	0.0814285
q1.5@5.ais	TJB.12	Dec. 2014	3507327000	8880675	7047480	17604.5	2.07466	0.0558576	0.00200936	1.12238e-07	0.00201491	4.84005	0.650071	0.0558576
q1.5@6.ais	TJB.12	Dec. 2014	3513250000	6782551	7065678	13257.6	2.96865	0.0885281	0.00201115	1.78043e-07	0.0020167	5.73631	0.664426	0.0885281
q1.5@10.ais	TJB.12	Dec. 2014	3531237000	6398632	7099050	12169.6	2.57317	0.102837	0.00201036	2.0674e-07	0.00201591	5.33942	0.672618	0.102837
q1.5@11.ais	TJB.12	Dec. 2014	3472971000	6526834	6985449	12852.1	3.08009	0.104858	0.00201138	2.1091e-07	0.00201693	5.84836	0.673865	0.104858
q1.5@12.ais	TJB.12	Dec. 2014	3521126000	6981996	7080748	13783	2.85939	0.0818093	0.00201093	1.64513e-07	0.00201648	5.62698	0.660972	0.0818093
q1.5@24.ais	TJB.12	Dec. 2014	3497109000	5542166	7031415	10842.4	2.71151	0.0646514	0.00201064	1.2999e-07	0.00201619	5.47877	0.653324	0.0646514
q1.5@26.ais	TJB.12	Dec. 2014	3493062000	6676165	7025629	13205.3	3.04708	0.0827165	0.00201131	1.66368e-07	0.00201686	5.81535	0.661423	0.0827165
q1.5@28.ais	TJB.12	Dec. 2014	3514499000	7891284	7063946	15383.5	2.36671	0.0930226	0.00200994	1.8697e-07	0.00201549	5.13244	0.666877	0.0930226	1s pop SD	0.386143
Jgp1.5 (treated)
q1.5cata@1.ais	TJB.12	Dec. 2014	3446584000	4971819	6915410	10021.1	0.625047	0.053339	0.00200645	1.07022e-07	0.00201199	3.38686	0.649225	0.053339
q1.5cata@2.ais	TJB.12	Dec. 2014	3455716000	2968801	6936250	5640.38	0.988434	0.0752525	0.00200718	1.51045e-07	0.00201272	3.75111	0.657848	0.0752525
q1.5cata@3.ais	TJB.12	Dec. 2014	3529328000	7052165	7091548	13666	2.0551	0.100802	0.00200932	2.02543e-07	0.00201487	4.82022	0.671384	0.100802
q1.5cata@7.ais	TJB.12	Dec. 2014	3356293000	10964840	6723079	21336.9	-1.03253	0.110516	0.00200313	2.21377e-07	0.00200866	1.7231	0.677471	0.110516
q1.5cata@8.ais	TJB.12	Dec. 2014	3556707000	27782930	7137436	55120.2	0.778459	0.110812	0.00200675	2.22373e-07	0.00201229	3.53721	0.677665	0.110812
q1.5cata@9.ais	TJB.12	Dec. 2014	3503855000	12094200	7025610	23585.3	-0.0438661	0.103066	0.00200511	2.06659e-07	0.00201064	2.71441	0.672758	0.103066	1s pop SD	1.01354		All qp1.5 SD	0.697953
Jgp2 (untreated)
q2@2.ais	TJB.12	Dec. 2014	3503986000	7900443	7034391	15668.4	1.16715	0.0588922	0.00200754	1.18228e-07	0.00201308	3.93012	0.651142	0.0588922
q2@5.ais	TJB.12	Dec. 2014	3480293000	7006353	6996026	13771.4	2.48562	0.0915913	0.00201018	1.84115e-07	0.00201573	5.25201	0.666084	0.0915913
q2@6.ais	TJB.12	Dec. 2014	3492179000	5719034	7019963	11451.1	2.4913	0.0727197	0.0020102	1.46181e-07	0.00201574	5.2583	0.656708	0.0727197
q2@7.ais	TJB.12	Dec. 2014	3485435000	6461523	7007193	12630.9	2.60461	0.0663501	0.00201042	1.33392e-07	0.00201597	5.37119	0.654005	0.0663501
q2@8.ais	TJB.12	Dec. 2014	3489589000	6365589	7014399	12294.2	2.44086	0.100529	0.00201009	2.02073e-07	0.00201564	5.20706	0.671221	0.100529
q2@10.ais	TJB.12	Dec. 2014	3459614000	6170910	6954300	12253.4	2.46246	0.0648306	0.00201014	1.30318e-07	0.00201569	5.22925	0.653395	0.0648306
q2@12.ais	TJB.12	Dec. 2014	3488302000	7332386	7010714	14376.2	2.28394	0.0966364	0.00200978	1.94218e-07	0.00201533	5.04965	0.66893	0.0966364
q2@14.ais	TJB.12	Dec. 2014	3462731000	6799419	6963324	13354.3	2.86021	0.132226	0.00201093	2.65898e-07	0.00201648	5.62762	0.692855	0.132226
q2@15.ais	TJB.12	Dec. 2014	3540244000	6701005	7115733	13126.6	2.37195	0.0982895	0.00200996	1.97558e-07	0.0020155	5.13823	0.669892	0.0982895
q2@18.ais	TJB.12	Dec. 2014	3494941000	6506699	7024748	12748	2.38232	0.0713819	0.00200998	1.43476e-07	0.00201552	5.14853	0.656121	0.0713819
q2@19.ais	TJB.12	Dec. 2014	3441034000	6434018	6920324	12439.7	2.95172	0.0904517	0.00201112	1.81909e-07	0.00201667	5.71935	0.665461	0.0904517	1s pop SD	0.215439
q2@20.ais	TJB.12	Dec. 2014	3517232000	10501770	7059365	20970.1	0.937693	0.0337706	0.00200708	6.77802e-08	0.00201262	3.70009	0.643952	0.0337706
Jgp2 (treated)
q2cata@2.ais	TJB.12	Dec. 2014	3461439000	8008532	6949901	15513.7	1.30102	0.089995	0.00200781	1.80693e-07	0.00201335	4.06373	0.665214	0.089995
q2cata@4.ais	TJB.12	Dec. 2014	3183849000	15111170	6374874	29816.4	-1.46751	0.0895408	0.00200225	1.79283e-07	0.00200778	1.28679	0.664968	0.0895408
q2cata@5.ais	TJB.12	Dec. 2014	3444119000	5283021	6916044	10330.1	1.43334	0.0823486	0.00200807	1.65362e-07	0.00201362	4.19705	0.66124	0.0823486
q2cata@9.ais	TJB.12	Dec. 2014	3460777000	6720090	6953325	13411.8	1.98505	0.0538689	0.00200918	1.08232e-07	0.00201473	4.75056	0.6494	0.0538689
q2cata@10.ais	TJB.12	Dec. 2014	3474985000	5359794	6981922	10264.4	1.99292	0.086072	0.00200919	1.72935e-07	0.00201474	4.75783	0.663134	0.086072
q2cata@14.ais	TJB.12	Dec. 2014	3310763000	1724089	6635418	3653.69	-0.500624	0.0418625	0.0020042	8.39007e-08	0.00200973	2.25801	0.64585	0.0418625
q2cata@16.ais	TJB.12	Dec. 2014	3469581000	5662669	6971560	10999.2	2.06414	0.0768229	0.00200934	1.54363e-07	0.00201488	4.82928	0.658574	0.0768229	1s pop SD	0.359811		All qp2 SD	0.460265
q2cata@17.ais	TJB.12	Dec. 2014	2973804000	14189270	5934358	28336.3	-4.81547	0.0412161	0.00199554	8.22486e-08	0.00200105	-2.06847	0.645684	0.0412161
Jgp3 (untreated)
q3@1.ais	TJB.12	Dec. 2014	2912519000	14232350	5832131	28367.1	-1.3782	0.0585452	0.00200244	1.17233e-07	0.00200796	1.37754	0.651017	0.0585452
q3@6.ais	TJB.12	Dec. 2014	3464234000	6015203	6962344	11582.1	2.28419	0.0913654	0.00200978	1.83624e-07	0.00201533	5.04984	0.66596	0.0913654
q3@12.ais	TJB.12	Dec. 2014	3458744000	7385067	6947062	14386.8	1.6717	0.101263	0.00200855	2.03392e-07	0.00201409	4.4356	0.671662	0.101263
q3@16.ais	TJB.12	Dec. 2014	3400029000	6694623	6833229	12885.5	2.27312	0.0949848	0.00200976	1.90896e-07	0.0020153	5.0385	0.667983	0.0949848
q3@14.ais	TJB.12	Dec. 2014	3512409000	10485910	7045107	20707.9	0.288342	0.111725	0.00200578	2.24096e-07	0.00201131	3.04832	0.678265	0.111725	1s pop SD	0.322762
q3@19.ais	TJB.12	Dec. 2014	3412535000	7217572	6859035	14030.9	2.37105	0.078008	0.00200995	1.56792e-07	0.0020155	5.13697	0.659131	0.078008
Jgp3 (treated)
q3cata@1.ais	TJB.12	Dec. 2014	3165467000	12901520	6344099	25862.2	-0.519143	0.0948725	0.00200416	1.9014e-07	0.00200969	2.23947	0.667919	0.0948725
q3cata@2.ais	TJB.12	Dec. 2014	3465870000	6527704	6963517	12598.2	1.9798	0.097802	0.00200917	1.96501e-07	0.00201471	4.74468	0.669607	0.097802	1s pop SD	0.315737		All qp3 SD	0.351852
q3cata@6.ais	TJB.12	Dec. 2014	3446012000	5937192	6920542	11490.5	1.53436	0.0745945	0.00200828	1.49806e-07	0.00201382	4.29816	0.657548	0.0745945
Jbqm (untreated)
bqm@1.ais	TJB.12	Dec. 2014	3422353000	5562495	6882529	11013.6	2.91853	0.034812	0.00201105	7.00087e-08	0.0020166	5.68643	0.644174	0.034812
bqm@2.ais	TJB.12	Dec. 2014	3388964000	7173001	6816699	14072.4	3.11276	0.097251	0.00201144	1.95615e-07	0.00201699	5.88077	0.669286	0.097251
bqm@3.ais	TJB.12	Dec. 2014	3387072000	14632540	6789874	29218.6	-0.276837	0.0805035	0.00200464	1.61381e-07	0.00201018	2.48211	0.66033	0.0805035
bqm@5.ais	TJB.12	Dec. 2014	3457406000	7066182	6950210	14096.1	2.51267	0.0803257	0.00201024	1.61474e-07	0.00201579	5.27964	0.660244	0.0803257
bqm@6.ais	TJB.12	Dec. 2014	3474738000	6131063	6986293	11962	2.69114	0.0773074	0.0020106	1.55434e-07	0.00201615	5.45833	0.658801	0.0773074
bqm@7.ais	TJB.12	Dec. 2014	3441413000	5141716	6920109	10285	2.80938	0.063319	0.00201083	1.27324e-07	0.00201638	5.57735	0.652802	0.063319
bqm@9.ais	TJB.12	Dec. 2014	3453059000	6587093	6941400	12738.7	2.503	0.105549	0.00201022	2.12177e-07	0.00201577	5.26929	0.674296	0.105549
bqm@11.ais	TJB.12	Dec. 2014	3478733000	6436715	6992707	12499.1	2.45928	0.0872621	0.00201013	1.75408e-07	0.00201568	5.22569	0.663756	0.0872621
bqm@12.ais	TJB.12	Dec. 2014	3463700000	6516412	6965739	12695.4	2.92722	0.0861603	0.00201107	1.73274e-07	0.00201662	5.69495	0.66318	0.0861603
bqm@10.ais	TJB.12	Dec. 2014	3511849000	7619186	7057281	14749	2.17667	0.102634	0.00200956	2.06249e-07	0.00201511	4.94182	0.672493	0.102634
bqm@13.ais	TJB.12	Dec. 2014	3466575000	7452242	6971125	14571.5	2.87046	0.0661413	0.00201095	1.33007e-07	0.00201651	5.63785	0.65392	0.0661413	1s pop SD	0.283033
Jbqm (treated)
bqmcata@1.ais	TJB.12	Dec. 2014	3726642000	9453159	7481948	18728.5	1.24314	0.0797365	0.00200769	1.60086e-07	0.00201323	4.00611	0.659958	0.0797365
bqmcata@2.ais	TJB.12	Dec. 2014	3511466000	5986465	7056462	12090.6	2.16862	0.123069	0.00200955	2.47314e-07	0.0020151	4.93479	0.686073	0.123069
bqmcata@11.ais	TJB.12	Dec. 2014	3487348000	6817540	7013249	13090.4	2.92098	0.110125	0.00201106	2.21468e-07	0.00201661	5.68811	0.677217	0.110125
bqmcata@12.ais	TJB.12	Dec. 2014	3469881000	7807448	6975031	15219.5	2.47636	0.0974133	0.00201016	1.95817e-07	0.00201571	5.24264	0.66938	0.0974133
bqmcata@13.ais	TJB.12	Dec. 2014	3510620000	6946024	7055123	13870.7	2.22009	0.0724057	0.00200965	1.4551e-07	0.0020152	4.98623	0.656569	0.0724057
bqmcata@14.ais	TJB.12	Dec. 2014	3473699000	6066949	6984641	11833.7	2.75409	0.0980749	0.00201072	1.97201e-07	0.00201627	5.52124	0.669767	0.0980749	1s pop SD	0.328431		All bqm SD	0.301608
Jpg (untreated)
pqm@5.ais	TJB.12	Dec. 2014	3797039000	10602250	7615053	21071	0.161909	0.0820525	0.00200552	1.64558e-07	0.00201106	2.92213	0.661092	0.0820525
pqm@6.ais	TJB.12	Dec. 2014	3531611000	6065220	7102463	11911	2.94854	0.103669	0.00201111	2.08489e-07	0.00201666	5.71624	0.673128	0.103669
pqm@7.ais	TJB.12	Dec. 2014	3529152000	6371305	7091976	12402.8	2.16555	0.0783685	0.00200954	1.57485e-07	0.00201509	4.93098	0.659302	0.0783685
pqm@8.ais	TJB.12	Dec. 2014	3540986000	6656329	7114968	13134.8	2.0543	0.114331	0.00200932	2.29728e-07	0.00201486	4.81957	0.68	0.114331
pqm@10.ais	TJB.12	Dec. 2014	3504923000	6135864	7050687	11696.2	3.21877	0.136163	0.00201165	2.73913e-07	0.0020172	5.98683	0.695898	0.136163
pqm@11.ais	TJB.12	Dec. 2014	3501466000	6607950	7040473	12956.4	2.75403	0.104444	0.00201072	2.10009e-07	0.00201627	5.52128	0.673608	0.104444
pqm@12.ais	TJB.12	Dec. 2014	3504947000	7779571	7043715	15449.9	2.21921	0.0910052	0.00200965	1.82889e-07	0.0020152	4.98519	0.665763	0.0910052
pqm@13.ais	TJB.12	Dec. 2014	3483975000	6198861	7003503	12330.3	2.49596	0.0856868	0.0020102	1.72248e-07	0.00201575	5.26285	0.662934	0.0856868
pqm@14.ais	TJB.12	Dec. 2014	3481485000	6362459	6999888	12818.2	2.69512	0.129447	0.0020106	2.60267e-07	0.00201615	5.46256	0.690752	0.129447
pqm@20.ais	TJB.12	Dec. 2014	3465779000	9636429	6940466	19318.2	-1.3113	0.089526	0.00200257	1.79282e-07	0.0020081	1.44501	0.66496	0.089526	1s pop SD	0.410169
Jpg (treated)
pqmcata@1.ais	TJB.12	Dec. 2014	3616549000	9875971	7254813	19036.4	0.402553	0.126071	0.002006	2.52899e-07	0.00201154	3.16232	0.68825	0.126071
pqmcata@2.ais	TJB.12	Dec. 2014	3521669000	4532593	7078525	9056.53	2.3896	0.0476833	0.00200999	9.58429e-08	0.00201554	5.15625	0.647462	0.0476833
pqmcata@4.ais	TJB.12	Dec. 2014	3385061000	12353530	6786778	24708.4	-0.139216	0.0847026	0.00200492	1.69822e-07	0.00201045	2.62028	0.662428	0.0847026	1s pop SD	NA		All pg SD	0.410169
Jqmd (untreated)
gd@1.ais	TJB.12	Dec. 2014	3441568000	6329843	6922477	11938.9	3.10854	0.123154	0.00201143	2.47717e-07	0.00201698	5.87615	0.686135	0.123154
gd@5.ais	TJB.12	Dec. 2014	3527980000	10017410	7084127	19617.6	1.38936	0.0794588	0.00200798	1.59552e-07	0.00201353	4.15225	0.659824	0.0794588
gd@8.ais	TJB.12	Dec. 2014	3014667000	7098588	6036258	13621.4	-1.44669	0.145781	0.0020023	2.91896e-07	0.00200782	1.30824	0.703648	0.145781
gd@13.ais	TJB.12	Dec. 2014	3531454000	7309514	7084981	14501.5	0.524034	0.0786431	0.00200625	1.57778e-07	0.00201179	3.28537	0.659433	0.0786431
gd@14.ais	TJB.12	Dec. 2014	3609903000	14729970	7228036	29491.2	-1.45632	0.0908719	0.00200228	1.81951e-07	0.00200781	1.29977	0.66569	0.0908719
gd@15.ais	TJB.12	Dec. 2014	3490408000	7034624	7018482	14017.8	2.78842	0.0570124	0.00201079	1.1464e-07	0.00201634	5.55618	0.650472	0.0570124
gd@17.ais	TJB.12	Dec. 2014	3702179000	12367300	7428449	24533.5	0.652538	0.0658474	0.00200651	1.32123e-07	0.00201205	3.41381	0.653801	0.0658474
gd@19.ais	TJB.12	Dec. 2014	3565916000	10056380	7148928	19624.8	-0.201301	0.0996095	0.00200479	1.99696e-07	0.00201033	2.55719	0.670672	0.0996095
gd@22.ais	TJB.12	Dec. 2014	3498995000	9879631	7024528	19937.1	1.18901	0.0828532	0.00200758	1.66335e-07	0.00201313	3.95251	0.661492	0.0828532	1s pop SD	0.226253
Jqmd (treated)
gdcata@2.ais	TJB.12	Dec. 2014	3412818000	5296746	6840043	10302.8	-0.487657	0.0739665	0.00200422	1.48245e-07	0.00200975	2.27073	0.657265	0.0739665
gdcata@4.ais	TJB.12	Dec. 2014	3451696000	6088686	6945263	11668.4	3.45707	0.101887	0.00201213	2.05011e-07	0.00201768	6.22592	0.672039	0.101887
gdcata@6.ais	TJB.12	Dec. 2014	3447270000	14205050	6928882	28571.9	2.47492	0.0958548	0.00200996	1.92665e-07	0.00201551	5.14151	0.66848	0.0958548
gdcata@7.ais	TJB.12	Dec. 2014	3411268000	30783260	6841014	60322.7	0.20938	0.316181	0.00200542	6.34075e-07	0.00201095	2.86848	0.899997	0.316181
gdcata@8.ais	TJB.12	Dec. 2014	3531009000	17912670	7072683	35343.4	-0.987102	0.202265	0.00200302	4.05141e-07	0.00200855	1.6701	0.757468	0.202265	1s pop SD	0.766793		All qmd SD	0.461958
Mt. Dromedary (untreated)
MtD@27.ais	TJB.12	Dec. 2014	3516018000	5434261	7076895	10595.9	3.76997	0.0956642	0.00201276	1.92549e-07	0.00201831	6.53992	0.668371	0.0956642
MtD@28.ais	TJB.12	Dec. 2014	3503439000	6545243	7053636	12857.1	4.06311	0.0743673	0.00201335	1.49727e-07	0.0020189	6.83389	0.657446	0.0743673
MtD@29.ais	TJB.12	Dec. 2014	3541812000	6269041	7128341	12094.2	3.70373	0.0962735	0.00201263	1.93763e-07	0.00201818	6.47341	0.66872	0.0962735
MtD@31.ais	TJB.12	Dec. 2014	3506961000	6052892	7062228	11443.2	4.27711	0.123638	0.00201377	2.4898e-07	0.00201933	7.04793	0.686483	0.123639	1s pop SD	0.266888
Mt. Dromedary (treated)
MtDcata@24.ais	TJB.12	Dec. 2014	3532834000	8491870	7098224	16350.4	2.00374	0.10947	0.00200922	2.19948e-07	0.00201476	4.76804	0.676792	0.10947
MtDcata@25.ais	TJB.12	Dec. 2014	3472284000	6037038	6988709	11720	3.74707	0.0755066	0.00201271	1.51973e-07	0.00201827	6.51688	0.657965	0.0755066
MtDcata@26.ais	TJB.12	Dec. 2014	3493447000	6104772	7030150	11891.9	3.58215	0.0690325	0.00201238	1.3892e-07	0.00201794	6.35168	0.655114	0.0690325
MtDcata@27.ais	TJB.12	Dec. 2014	3519242000	5703092	7081535	11064.5	3.50789	0.116374	0.00201223	2.34171e-07	0.00201779	6.27716	0.681384	0.116374	1s pop SD	0.122682		All Mt. D SD	0.272079
RED analysis is partially off the grain or on an inclusion or crack, not included in sample average
BLUE analysis is outside of external error limits, not included in sample average

## Sheet: S6 Petrography
Table S6. Petrography of Yerington mine rocks					(It should be noted that these observations are from sampled historic core only and may not represent the entire range of variation of the unit).
Jgp1
Mineralogy	Plagioclase	Orthoclase	Quartz	Hornblende	Biotite	Opaques (mt, il, Cu-S minerals)	Alteration minerals
Mode	<5%	0.1	0.7	<5%	trace	<10%	trace
Textures	anhedral; microlites to ~200x200 µm; surrounded by hbl shreds in veins between qtz	30% as microlites up to 40 µm long; anhedral and ratty edged; >1x1 mm max, avg 500 µm; highly included	60% as patches of anhedral grains ~100-200 x ≤ 500 µm, roughly equant and intergrown; many grains mottled; v.fg. grains in microveins and included in larger xtal portion	Only as small anhedral xtals in vein-like structures; altering to bt	~40 x 100 µm shreds surrounded by minor chl(?) and hbl in veins between qtz; secondary	Highly anhedral and space-filling in clumps and masses; not evenly distributed	Sericite with minor chl; shreddy laths; usually in clumps and filling cracks, or concentrated around qtz grains
Description	There appear to be 3 main textural components: 1) the original (now altered) groundmass w/ Kspar>>qtz>plag, ~40%; 2) the results of QSP alteration--large rextal qtz patches, ~40%; and 3) vein-like structures that run through and between 1 + 2 w/ shreddy biotite, ep, v.fg. qtz, and large amounts of opaques.
Jgp1.5
Mineralogy	Plagioclase	Orthoclase	Quartz	Muscovite	Biotite	Opaques (mt, il, Cu-S minerals)	Alteration minerals	Accessories
Mode	0.3	0.1	0.3	0.05	0.1	trace	~5%	trace
Textures	28% as euhedral phenos ~2.5x1.5 mm avg, up to >3 x >2 mm; a few phenos broken and subhedral; 2% as v.fg., anhedral in g'mass	5% as euhedral phenos ~150x200 µm avg; likely in g'mass but masked by overprint	10% in g'mass overprinted by sericite; 20% as v.fg. grains in vein, xtal w/diffuse boundaries	Anhedral shreds; likely from alteration	~50 x 100 µm avg (500x50 µm max) anhedral shreds w/ musc + v.fg. qtz; secondary	Anhedral clusters concentrated in veins w/ v.fg. qtz + bt/musc	Pervasive (>95% overprint) sericite with 5% chl and trace epidote; chl in veins b/w large qtz xtlas; also around feldspar in g'mass; ep anhedral in veins	Zircon 60x20 µm to 50x100 µm
Description	There appear to be 3 main textural components: 1) the original (now altered) groundmass w/ Kspar~qtz>plag, v.fg. and ~20-25% large phenos of plag and Kspar; 2) qtz/mica veins that cut g'mass up to 1 mm thick. Qtz is rextal with 2ndary micas/opaques; and 3) late sericitic alteration added veneer of sericite to everything, rendering ovservation of initial textures difficult.
Jgp2
Mineralogy	Plagioclase	Orthoclase	Quartz		Trace minerals	Opaques (mt, il, Cu-S minerals)	Alteration minerals
Mode	0.3	0.2	0.3		trace	0.05	0.15
Textures	25% an-to-euhedral phenos; grains 2x1mm avg; equigranular; 5% g'mass	15% as g'mass; 5% as sub-to-anhedral phenos up to 5x3mm; no visible zoning	10% in masses, ~100x100 µm max size ; 20% anhedral, in veins, 150x150 µm to 750 µm x 200 mm and rextal/intergrown; 1-2 eyes 1x1 mm		Zircon in trace amounts	Highly anhedral and space-filling in clumps and masses; not evenly distributed	Sericite with 5% chl in shreddy laths; 10% 2ndary epidote and clinozoisite, anhedral
Description	There appear to be 3 main textural components: 1) primary texture is porphyritic w/ large proportion of phenocrysts ; 2) sericitic and potassic alteration overprints, causing plag-->Kspar+chl; and 3) late quartz veining.
Jgp3
Mineralogy	Plagioclase	Orthoclase	Quartz	Muscovite	Hornblende	Opaques (mt, il, Cu-S minerals)	Alteration minerals	Accessories
Mode	0.4	30-35%	0.1	5-8%	2-3%	0.01	trace	~2%
Textures	25% euhedral phenocryst laths >3 x >1 mm max, avg 1x2 mm; 15% g'mass; overprinted w/ sericite and transitioning to Kspar	20% as euhedral phenos ~3x1.5 mm avg to 2x5 mm w/ rxn rims and plentiful microlite inclusions; ~5% in g'mass but masked by overprint	5-10 eyes ~1x1 mm; most isolated grains subhedral 200x200 µm avg	Replacing bt books, an-euhedral	Anhedral laths, many altering to bt	Anhedral interstitial blebs up to 500 µm x 500 µm	Isolated clumps of chl and epidote and sericite overprint	Trace zircon; 2% euhedral titanite 500 x 200 µm avg up to >1mm x 500 µm
Description	Fine-grained groundmass dominated by phenocrysts (~15-20% g'mass, 80-85% phenos) overprinted by sericite. Late qtz alteration formed qtz eyes.
Jbqm
Mineralogy	Plagioclase	Orthoclase	Quartz	Hornblende	Accessories	Opaques (mt, il, Cu-S minerals)	Alteration minerals
Mode	0.2	0.25	0.25	0.15	0.05	trace	~10%
Textures	Phenos being replaced by Kspar; oscillatory zoning; ~500 x 700 µm avg; many inclusions	Highly included w/ sericite overprint; 600x700 µm avg size, equigranular	Anhedral and interstitial w/ undulose ext., likely late-stage rextal; ~500x500 µm avg, equigranular	Max 750 x 750 µm, avg 350 x 400 µm; clumped anhedral shreds	Zircon, apatite, allanite/chevkinite, muscovite in trace amounts	Interstitial and in veins	Sericite with trace clinozoisite
Description	Equigranular, medium to fine-grained, with some alteration. Most of original texutre and structure intact. One ~750 µm-wide qtz vein w/ central location surrounded by qtz dominates section.
Jpg
Mineralogy	Plagioclase	Orthoclase	Quartz	Accessories	Biotite	Opaques (mt, il, Cu-S minerals)	Alteration minerals
Mode	0.25	0.25	0.4	0.01	~2%	0	7-8%
Textures	Highly included phenos >3 x 1.5 mm, eu- to subhedral tabular	Phenos up to 5 x 3 mm, highly included; prominent oscillatory zoning; tabular subhedral	15% as euhedral phenos 3x2 mm max, 1x1 mm avg, anhedral and equant; 25% in g'mass, ~50x100 µm avg, equant and anhedral; all have rextal textures	trace titanite (being replaced by (likely) leucoxene); trace zircon	Subhedral grains with ratty edges; ~1x1 mm max, 500x200 µm most common	None seen	5% epidote/clinozoisite in multiple generations; trace chl associated w/ bt; ~2-3% secondary allanite
Description	Overall strongly porphyritic w/ >>50% phenocrysts and minor g'mass. Sericitic and silicic alteration minor. No veins or opaques. Transitional texture (Carten, 1986)?
Jqmd
Mineralogy	Plagioclase	Orthoclase	Quartz	Hornblende	Biotite	Opaques (mt, il, Cu-S minerals)	Alteration minerals	Muscovite
Mode	0.5	0.2	10-15%	0.02	0.1	trace	~3%	~5%
Textures	Highly sericitzed and converting to Kspar; highly included; eu- to subhedral, 2x2 mm max, 1.5 x 1.75 mm avg, tabular to square	Highly sericitized, eu- to subhedral tabular; 3x2 mm max, avg ~1.5 x 1 mm	Space-filling anhedral w/ undulose ext. and possible suturing; 1x1 mm max, 500 x 500 µm avg, generally ~equant	Anhedral and shreddy grains, ~ 3x3 mm	Shreddy an- to subhedral grains, avg 1 x 0.5 mm	Interstitial and very minor	Epidote interstitial 200x300 µm xtals, roughly equant, subhedral; sericite overprint	Zircon, apatite, allanite/chevkinite, muscovite in trace amounts
Description	Feldspar-dominated original equigranular texture w/ minor later qtz alteration and pervasive sericitization.

## Sheet: S7 Diffusivity
From Cherniak and Watson, 1997:
D (m^2/s)	T (K)		D (um^2/s)	D (um^2/hr)
1.88068e-25	1123.15		1.88068e-13	6.77043e-10
